# Supplementary material for: A novel 4-aminoantipyrine-Pd(II) complex catalyzes Suzuki–Miyaura cross-coupling reactions of aryl halides
Source: publisher site journal article supplement (doi:10.3762/bjoc.10.299), 2014-12-01
Supplement: Additional file 1 [file 1860-5397-10-299-S1.pdf]

## Supporting Information

for

# **A novel 4-aminoantipyrine-Pd(II) complex catalyzes Suzuki–Miyaura cross-coupling reactions of aryl halides**

Claudia A. Contreras-Celedón\*, Darío Mendoza-Rayó, José A. Rincón-Medina and Luis Chacón-García

Address: Laboratorio de Síntesis y Diseño Molecular, Instituto de Investigaciones Químico Biológicas, Universidad Michoacana de San Nicolás de Hidalgo. Edificio B-1, Ciudad Universitaria, Morelia, Michoacán, México. CP 58030, tel.: +52 443 326 5790; fax: +52 443 326 5788

Email: Claudia A. Contreras Celedón - celedon@umich.mx

\*Corresponding Author

**Full experimental details and copies of all NMR spectra (<sup>1</sup>H and <sup>13</sup>C spectra) of all compounds isolated**

## Table of Contents

|                                                                                            |     |
|--------------------------------------------------------------------------------------------|-----|
| General methods and materials                                                              | S3  |
| Synthesis and characterization of 4-aminoantipyrine palladium(II)<br>complex, 4-AAP–Pd(II) | S3  |
| General procedure for the Suzuki–Miyaura cross-coupling reaction                           | S4  |
| Characterization of the products                                                           | S4  |
| $^1\text{H}$ NMR and $^{13}\text{C}$ NMR spectra                                           | S12 |
| References                                                                                 | S39 |

**General methods and materials:** All reagents and solvents used were obtained commercially and used without further purification unless indicated otherwise. All products were characterized by  $^1\text{H}$  NMR and  $^{13}\text{C}$  NMR.  $^1\text{H}$  NMR spectra were recorded on 400 MHz in  $\text{CDCl}_3$ , and  $^{13}\text{C}$  NMR spectra were recorded on 101 MHz in  $\text{CDCl}_3$  using TMS as internal standard. Multiplicities are indicated as s (singlet), d (doublet), t (triplet), q (quartet), and m (multiplet), and coupling constants (J) are reported in hertz.

**Synthesis of 4-aminoantipyrine–palladium (II) complex, 4-AAP–Pd(II):** [1] To a stirred solution 0.5 M of  $\text{Li}_2\text{PdCl}_4$  (1.13 mL, 0.56 mmol) in methanol at room temperature was added a solution of 4-AAP (0.115 g, 0.56 mmol) in methanol (2mL) and AcONa (0.046 g, 0.56 mmol). Stirring was continued for 3 days and then the mixture was diluted with  $\text{H}_2\text{O}$  (2 mL). The precipitated compound was filtered, washed with  $\text{H}_2\text{O}$  (2 X 2 mL) and ethyl ether (2 x 2 mL). After recrystallization ( $\text{CHCl}_3$ :Hex) provided the 4-AAP-Pd(II) complex as orange solid. Yield 74%; mp 210°C; IR (neat): 3478, 2926, 1616, 1586  $\text{cm}^{-1}$ ; UV:  $\lambda^{\text{max}}$  465 nm;  $^1\text{H}$ -NMR (400 MHz,  $\text{CDCl}_3$ )  $\delta$  ppm: 7.55 – 7.44 (m, 2H), 7.42 – 7.33 (m, 3H), 3.07 (s, 3H), 2.29 (s, 3H), 1.84 (q, 1H);  $^{13}\text{C}$ -NMR ( $\text{CDCl}_3$ )  $\delta$  ppm: 161.4, 143.7, 133.2, 129.3, 129.0, 127.8, 124.7, 123.3, 112.3, 35.4, 10.3; Anal. Calcd. for  $\text{C}_{22}\text{H}_{24}\text{Cl}_2\text{N}_6\text{O}_2\text{Pd}_2$  C 38.39, H 3.51, N 12.21; found C 38.52, H 3.54, N 12.35.

**General Procedure for the Suzuki–Miyaura cross-coupling reaction:** In a 10 mL glass tube containing a Teflon-coated stir bar was placed p-bromobenzaldehyde **2e** (0.05 g, 0.27 mmol, 1 equiv), phenylboronic acid **1a** (0.05 g, 0.40 mmol, 1.5 equiv), 2M K<sub>2</sub>CO<sub>3</sub> (0.33 mL, 0.67 mmol, 2.5 equiv), 4-AAP-Pd(II) (0.28 mg, 0.3 mol % Pd) and EtOH (2 mL). The mixture was stirred at reflux for 4 h. After cooling, the mixture was diluted with ether Et<sub>2</sub>O (5 mL), washed with sat. aq. NaHCO<sub>3</sub> (3 mL), brine (3 mL) and dried over Na<sub>2</sub>SO<sub>4</sub>. Evaporation of the solvent and purification of the residue over a silica gel column (Hex: AcOEt 90:10), furnished the biphenyl **3q**.

### Characterization of the products

*1,1'-Biphenyl (3a):* [2]

White solid; m.p. = 69-70°C; <sup>1</sup>H-NMR (400 MHz, CDCl<sub>3</sub>): δ (ppm) 7.59 (dd, J = 8.2, 1.1Hz, 4H), 7.43 (m, 4H), 7.34 (m, 2H); <sup>13</sup>C-NMR (101 MHz, CDCl<sub>3</sub>): δ (ppm) 141.2, 128.7, 127.2, 127.1

*4-Methoxy-1,1'-biphenyl (3b):* [3]

White solid, m.p. = 88-89°C; <sup>1</sup>H-NMR (400 MHz, CDCl<sub>3</sub>): δ (ppm) 7.58-7.54 (m, 4H), 7.45-7.41 (m, 2H), 7.34-7.30 (m, 1H), 7.01-6.98 (m, 2H), 3.86 (m, 3H); <sup>13</sup>C-NMR (101 MHz, CDCl<sub>3</sub>): δ (ppm) 159.9, 140.6, 133.6, 128.5, 128.0, 126.5, 126.5, 114.0, 55.2

*4-(Trifluoromethyl)-1,1'-biphenyl (3c)*: [4]

White solid, m.p. = 66-67°C, <sup>1</sup>H-NMR (400 MHz, CDCl<sub>3</sub>): δ (ppm) 7.69 (s, 4H), 7.60 (m, 2H), 7.48 (m, 2H), 7.41 (m, 1H); <sup>13</sup>C-NMR (101 MHz, CDCl<sub>3</sub>): δ (ppm) 144.7, 139.7, 129.0, 128.2, 127.6, 127.4, 127.3, 125.73, 125.69, 125.65, 125.60

*3-Nitro-1,1'-biphenyl (3d)*: [5]

Light yellow solid, m.p. 57-58°C, <sup>1</sup>H-NMR (400 MHz, CDCl<sub>3</sub>): δ (ppm) 8.46 (t, J = 2Hz, 1H), 8.20 (ddd, J = 8.2, 2.3, 1.0Hz, 1H), 7.92 (dd, J=7.7, 1.8, 1.1Hz, 1H), 7.63 (m, 3H), 7.58 (m, 2H), 7.44 (m, 1H); <sup>13</sup>C-NMR (101 MHz, CDCl<sub>3</sub>): δ (ppm) 148.5, 142.7, 138.5, 132.9, 129.5, 129.0, 128.4, 127.0, 121.8, 121.8

*[1,1'-Biphenyl]-2-ylmethanol (3e)*: [6]

Colorless oil; <sup>1</sup>H-NMR (400 MHz, CDCl<sub>3</sub>): δ (ppm) 7.54-7.53 (m, 1H), 7.43-7.34 (m, 7H), 7.28-7.26 (m, 1H), 4.59 (s, 2H), 1.78 (b, 1H); <sup>13</sup>C-NMR (101 MHz, CDCl<sub>3</sub>): δ (ppm) 141.3, 140.6, 139.1, 138.0, 130.0, 129.1, 128.3, 127.7, 127.6, 127.2, 63.1

*(4'-Methoxy-[1,1'-biphenyl]-2-yl)methanol (3f)*: [7]

White solid, m.p. = 79-80°C, <sup>1</sup>H-NMR (400 MHz, CDCl<sub>3</sub>): δ (ppm) 7.52 (dd, J = 6.9, 1.8Hz, 1H), 7.36-7.20 (m, 5H), 6.96-6.94 (m, 2H), 4.60 (s, 2H), 3.84 (s, 3H), 1.71

(s, 1H);  $^{13}\text{C}$ -NMR (101 MHz,  $\text{CDCl}_3$ ):  $\delta$  (ppm) 158.7, 140.8, 132.8, 130.0, 130.0, 128.3, 127.5, 127.2, 113.5, 63.1, 55.1

*(4'-(Trifluoromethyl)-[1,1'-biphenyl]-2-yl)methanol (3g)*: [8]

Light yellow oil,  $^1\text{H}$ -NMR (400 MHz,  $\text{CDCl}_3$ ):  $\delta$  (ppm) 7.68 (d,  $J = 8\text{Hz}$ , 2H), 7.56 (dd,  $J = 7.5, 1.1\text{Hz}$ , 1H), 7.50 (d,  $J = 8\text{Hz}$ , 2H), 7.40 (dtd, 2H,  $J = 18.3, 7.4, 1.5\text{Hz}$ ), 7.27 (dd,  $J = 7.4, 1.4\text{Hz}$ , 1H), 4.56 (s, 2H), 1.82 (s, 1H);  $^{13}\text{C}$ -NMR (101 MHz,  $\text{CDCl}_3$ ):  $\delta$  (ppm) 144.3, 140.0, 137.7, 133.6, 129.9, 129.5, 128.7, 128.4, 127.9, 125.5, 125.2, 125.1, 125.1, 125.1, 62.9

*(3'-Nitro-[1,1'-biphenyl]-2-yl)methanol (3h)*:

Yellow oil,  $^1\text{H}$ -NMR (400 MHz,  $\text{CDCl}_3$ ):  $\delta$  (ppm) 8.28 (d,  $J = 1.7\text{Hz}$ , 1H), 8.23 (dd,  $J = 8.2, 1.1\text{Hz}$ , 1H), 7.76 (d,  $J = 7.6\text{Hz}$ , 1H), 7.59 (m, 2H), 7.44 (tdd,  $J = 15, 10.4, 4.3\text{Hz}$ , 2H), 7.30 (dd,  $J = 7.4, 1.2\text{Hz}$ , 1H), 4.58 (s, 2H), 1.94 (s, 1H);  $^{13}\text{C}$ -NMR (101 MHz,  $\text{CDCl}_3$ ):  $\delta$  (ppm) 147.9, 142.1, 138.8, 137.5, 135.2, 132.9, 130.1, 129.8, 129.0, 128.9, 128.6, 128.0, 123.8, 123.1, 122.0, 121.9, 62.7

*4-Nitro-1,1'-biphenyl (3i)*: [9]

Light yellow solid; m.p. 109-111°C;  $^1\text{H}$ -NMR (400 MHz,  $\text{CDCl}_3$ ):  $\delta$  (ppm) 8.30 (m, 2H), 7.74 (m, 2H), 7.62 (m, 2H), 7.53 (m, 3H);  $^{13}\text{C}$ -NMR (101 MHz,  $\text{CDCl}_3$ ):  $\delta$  (ppm) 147.6, 138.7, 129.1, 128.9, 127.8, 127.3, 124.1

*4-Methoxy-4'-nitro-1,1'-biphenyl (3j)*: [7]

Light yellow solid, m.p. = 105-106°C, <sup>1</sup>H-NMR (400 MHz, CDCl<sub>3</sub>): δ (ppm) 8.26 (d, J = 8.8Hz, 2H), 7.69 (d, J = 8.8Hz, 2H), 7.58 (d, J = 8.8Hz, 2H), 7.02 (d, J = 8.8Hz, 2H), 3.87 (s, 3H); <sup>13</sup>C-NMR (101 MHz, CDCl<sub>3</sub>): δ (ppm) 160.2, 147.0, 146.3, 130.9, 128.4, 126.9, 124.0, 114.4, 55.2

*4-Nitro-4'-(trifluoromethyl)-1,1'-biphenyl (3k)*: [10]

White solid, m.p. 108-109°C, <sup>1</sup>H-NMR (400 MHz, CDCl<sub>3</sub>): δ (ppm) 8.34 (d, J = 8.8Hz, 2H), 7.75 (m, 6H); <sup>13</sup>C-NMR (101 MHz, CDCl<sub>3</sub>): δ (ppm) 147.6, 146.0, 128.1, 127.8, 126.13, 126.09, 126.06, 126.02, 124.2

*3,4'-Dinitro-1,1'-biphenyl (3l)*: [11]

Yellow solid, m.p. 184-187°C, <sup>1</sup>H-NMR (400 MHz, CDCl<sub>3</sub>): δ (ppm) 8.50 (t, J = 1.8Hz, 1H), 8.37 (m, 2H), 8.31 (dd, J = 8.2, 2.1Hz, 1H), 7.96 (dd, J = 6.5, 1.3Hz, 1H), 7.80 (m, 2H), 7.71 (t, J = 8Hz, 1H); <sup>13</sup>C-NMR (101 MHz, CDCl<sub>3</sub>): δ (ppm) 133.1, 130.1, 127.9, 124.3, 123.4, 122.1

*[1,1'-Biphenyl]-2-ol (3m)*: [12]

White solid; m.p. 56-57°C, <sup>1</sup>H-NMR (400 MHz, CDCl<sub>3</sub>): δ (ppm) 7.47 (m, 4H), 7.39 (m, 1H), 7.26 (m, 2H), 6.99 (td, J = 7.4, 1.0, 2H), 5.22 (s, 1H); <sup>13</sup>C-NMR (101 MHz,

CDCl<sub>3</sub>): δ (ppm) 152.4, 137.1, 130.2, 129.2, 129.1, 128.7, 128.1, 127.8, 127.2, 127.1, 120.8, 115.8

*4'-Methoxy-[1,1'-biphenyl]-2-ol (3n)*: [7]

Light yellow oil, <sup>1</sup>H-NMR (400 MHz, CDCl<sub>3</sub>): δ (ppm) 7.40-7.38 (m, 2H), 7.25-7.20 (m, 2H), 7.02-6.95 (m, 4H), 5.25 (s, 1H), 3.45 (s, 3H); <sup>13</sup>C-NMR (101 MHz, CDCl<sub>3</sub>): δ (ppm) 159.1, 152.3, 130.1, 129.0, 128.6, 127.6, 120.6, 115.5, 114.5, 55.2

*4'-(Trifluoromethyl)-[1,1'-biphenyl]-2-ol (3o)*: [13]

White solid, m.p. 105-106°C, <sup>1</sup>H-NMR (400 MHz, CDCl<sub>3</sub>): δ (ppm) 7.73 (d, J = 8.2Hz, 2H), 7.63 (d, J = 8.1Hz, 2H), 7.29 (m, 2H), 7.03 (t, J = 7.5Hz, 1H), 6.96 (d, J = 8.1Hz, 1H), 5.04 (s, 1H); <sup>13</sup>C-NMR (101 MHz, CDCl<sub>3</sub>): δ (ppm) 152.3, 148.0, 141.1, 130.4, 129.8, 129.5, 126.9, 125.88, 125.84, 125.81, 125.77, 121.2, 116.2

*3'-Nitro-[1,1'-biphenyl]-2-ol (3p)*:

<sup>1</sup>H-NMR (400 MHz, CDCl<sub>3</sub>): δ (ppm) 8.46 – 8.42 (m, 1H), 8.22 (ddd, J = 8.2, 2.3, 1.1 Hz, 1H), 7.89 (ddd, J = 7.7, 1.7, 1.1 Hz, 1H), 7.65 – 7.59 (m, 1H), 7.36 – 7.28 (m, 2H), 7.06 (td, J = 7.5, 1.1 Hz, 1H), 6.95 (dd, J = 8.0, 1.1 Hz, 1H), 5.07 (s, 1H) ; <sup>13</sup>C-NMR (101 MHz, CDCl<sub>3</sub>): δ (ppm) 152.20, 139.40, 135.29, 133.03, 131.99, 129.96, 129.41, 129.15, 124.25, 123.27, 121.79, 116.10



*[1,1'-Biphenyl]-4-carboxaldehyde (3q): [4]*

White solid, m.p. = 58–60 °C; <sup>1</sup>H-NMR (400 MHz, CDCl<sub>3</sub>): δ (ppm) 10.06 (s, 1H), 7.96 (m, 2H), 7.76 (m, 2H), 7.64 (m, 2H), 7.50 (dd, J = 11.5, 4.4Hz, 2H), 7.43 (d, J = 7.3Hz, 1H); <sup>13</sup>C-NMR (101 MHz, CDCl<sub>3</sub>): δ (ppm) 192.0, 147.0, 140.0, 135.0, 130.1, 128.9, 128.3, 127.5, 127.2

*4'-Methoxy-[1,1'-biphenyl]-4-carboxaldehyde (3r): [14]*

White solid, m.p. = 100-102°C, <sup>1</sup>H-NMR (400 MHz, CDCl<sub>3</sub>): δ (ppm) 10.03 (s, 1H), 7.92 (d, J = 8.3Hz, 2H), 7.71 (d, J = 8.3Hz, 2H), 7.59 (d, J = 8.8Hz, 2H), 7.01 (d, J = 8.8Hz, 2H), 3.86 (s, 3H); <sup>13</sup>C-NMR (101 MHz, CDCl<sub>3</sub>): δ (ppm) 191.7, 159.9, 146.6, 134.4, 131.8, 130.1, 128.3, 126.8, 114.3, 55.2

*4'-(Trifluoromethyl)-[1,1'-biphenyl]-4-carboxaldehyde (3s): [15]*

Colorless oil, <sup>1</sup>H-NMR (400 MHz, CDCl<sub>3</sub>): δ (ppm) 10.08 (s, 1H), 7.99 (m, 2H), 7.76 (m, 6H); <sup>13</sup>C-NMR (101 MHz, CDCl<sub>3</sub>): δ (ppm) 191.6, 145.4, 143.0, 135.6, 130.2, 127.8, 127.5, 125.8, 125.79, 125.76, 125.72

*3'-Nitro-[1,1'-biphenyl]-4-carboxaldehyde (3t):* [16]

Light yellow solid, m.p. 112-115°C, <sup>1</sup>H-NMR (400 MHz, CDCl<sub>3</sub>): δ (ppm) 10.09 (s, 1H), 8.50 (t, J = 1.8Hz, 1H), 8.27 (dd, J = 8.2, 1.2, 1H), 8.02 (d, J = 8.3Hz, 2H), 7.97 (d, J = 7.7Hz, 1H), 7.80 (d, J = 8.2Hz, 2H), 7.68 (t, J = 8Hz, 1H); <sup>13</sup>C-NMR (101 MHz, CDCl<sub>3</sub>): δ (ppm) 191.6, 148.7, 144.3, 141.4, 133.2, 130.0, 127.8, 123.1, 122.2

*[1,1'-Biphenyl]-4-amine (3u):* [3]

Brown solid, m.p. = 49-51°C; <sup>1</sup>H-NMR (400 MHz, CDCl<sub>3</sub>): δ (ppm) 7.53 (dd, J = 8.2, 1.3Hz, 2H), 7.29 (m, 4H), 7.26 (m, 1H), 6.74 (m, 2H), 3.70 (b, 2H); <sup>13</sup>C-NMR (101 MHz, CDCl<sub>3</sub>): δ (ppm) 145.8, 141.0, 131.4, 128.5, 127.8, 126.2, 126.1, 115.2

*4'-Methoxy-[1,1'-biphenyl]-4-amine (3v):* [17]

Light yellow solid, m.p. = 143-145°C, <sup>1</sup>H-NMR (400 MHz, CDCl<sub>3</sub>): δ (ppm) 7.48 (d, J = 8.9Hz, 2H), 7.38 (d, J = 8.6Hz, 2H), 6.96 (d, J = 8.9Hz, 2H), 6.75 (d, J = 8.6Hz, 2H), 3.85 (s, 3H), 3.70 (b, 2H); <sup>13</sup>C-NMR (101 MHz, CDCl<sub>3</sub>): δ (ppm) 158.2, 145.1, 133.7, 131.1, 127.4, 127.2, 115.2, 113.9, 55.1

*4'-(Trifluoromethyl)-[1,1'-biphenyl]-4-amine (3w)*: [18]

Yellow solid, m.p.140-144°C, <sup>1</sup>H-NMR (400 MHz, CDCl<sub>3</sub>): δ (ppm) 7.62 (s, 4H), 7.42 (m, 2H), 6.75 (m, 2H), 3.79 (s, 2H); <sup>13</sup>C-NMR (101 MHz, CDCl<sub>3</sub>): δ (ppm) 146.65, 144.57, 132.0, 129.7, 128.1, 126.4, 125.60, 125.57, 125.53, 125.49, 116.7, 115.3

*3'-Nitro-[1,1'-biphenyl]-4-yl-amine (3x)*: [18]

Orange solid, m.p. 124-126°C, <sup>1</sup>H-NMR (400 MHz, CDCl<sub>3</sub>): δ (ppm) 8.39 (t, J = 2Hz, 1H), 8.10 (ddd, J = 8.2, 2.3, 1.0Hz), 7.85 (ddd, J = 7.8, 1.8, 1.0Hz), 7.54 (t, J = 8Hz, 1H), 7.45 (m, 2H), 6.79 (m, 2H), 3.84 (s, 2H); <sup>13</sup>C-NMR (101 MHz, CDCl<sub>3</sub>): δ (ppm) 146.8, 142.6, 131.9, 129.3, 128.5, 127.9, 115.3

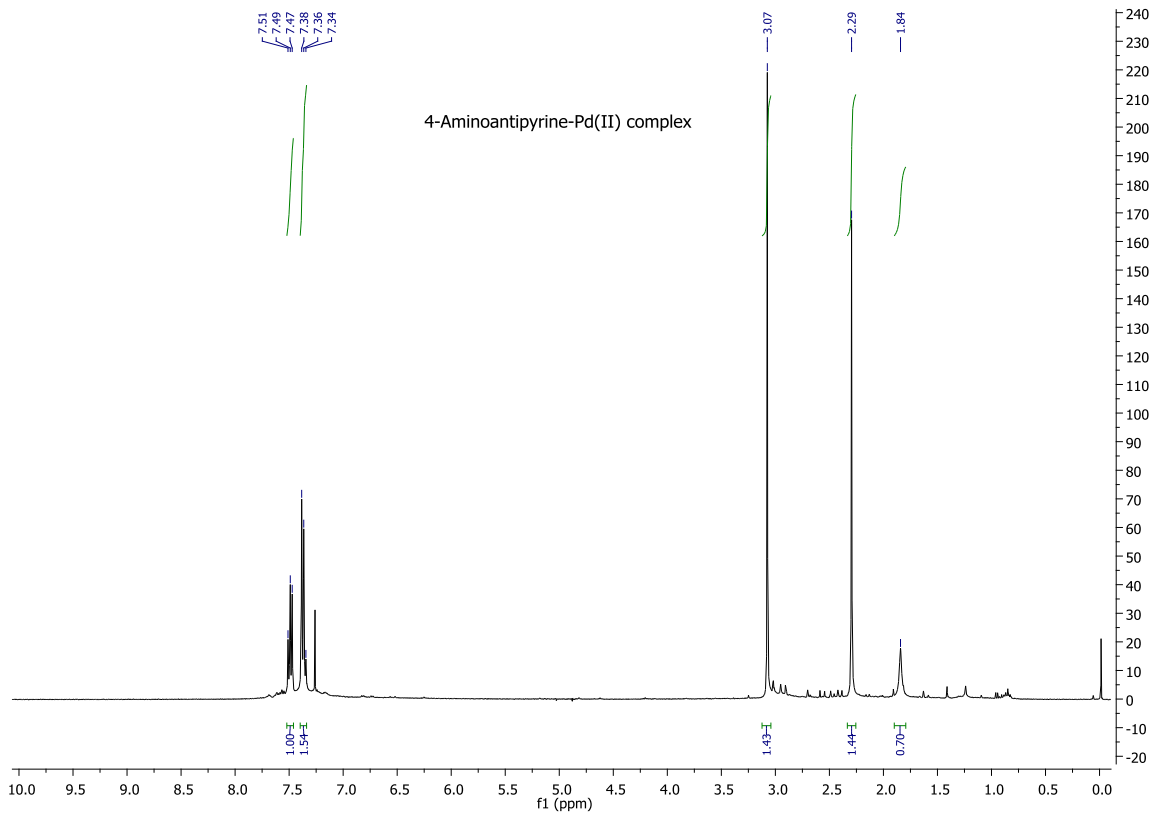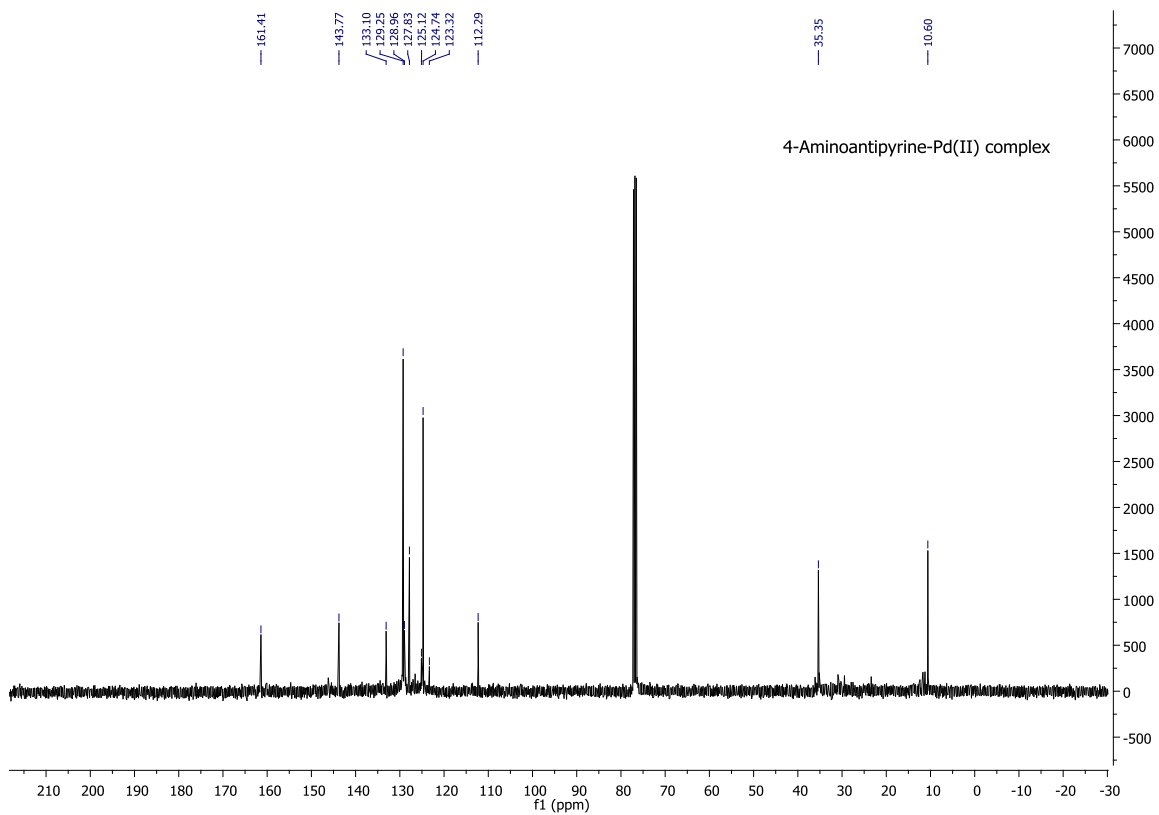

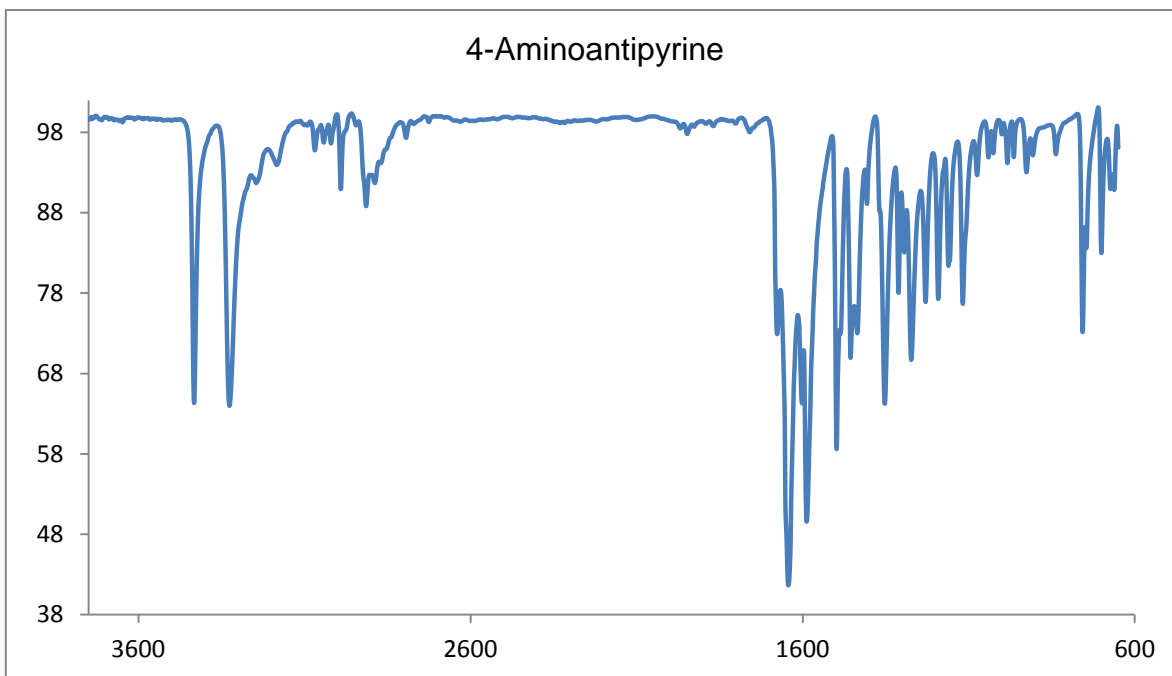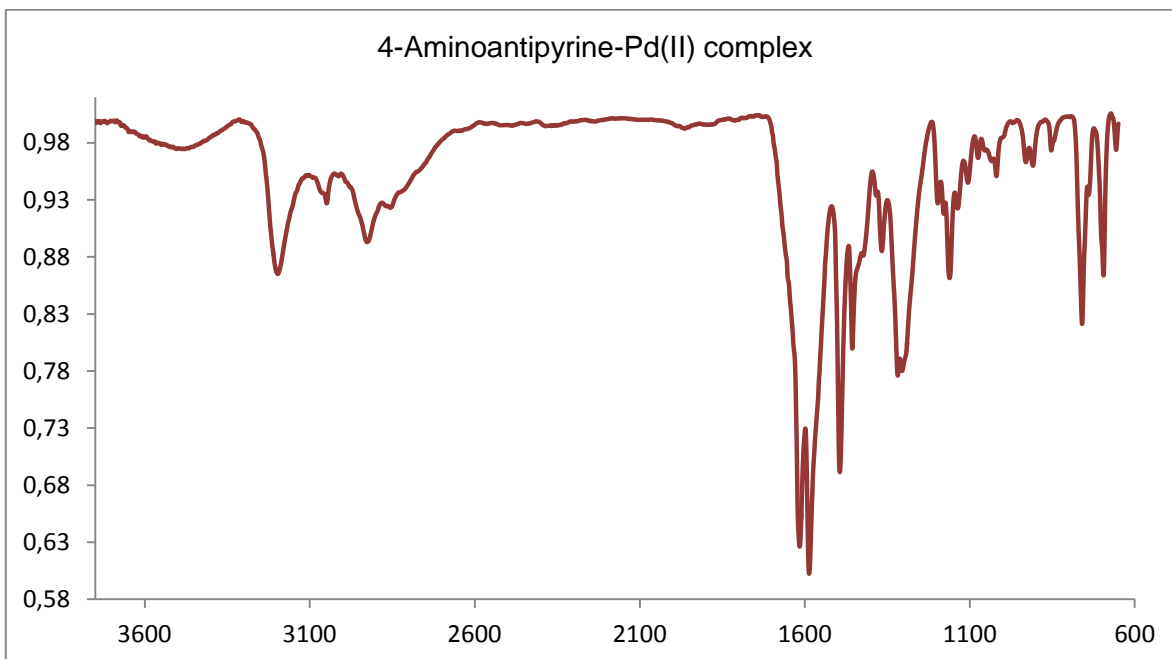

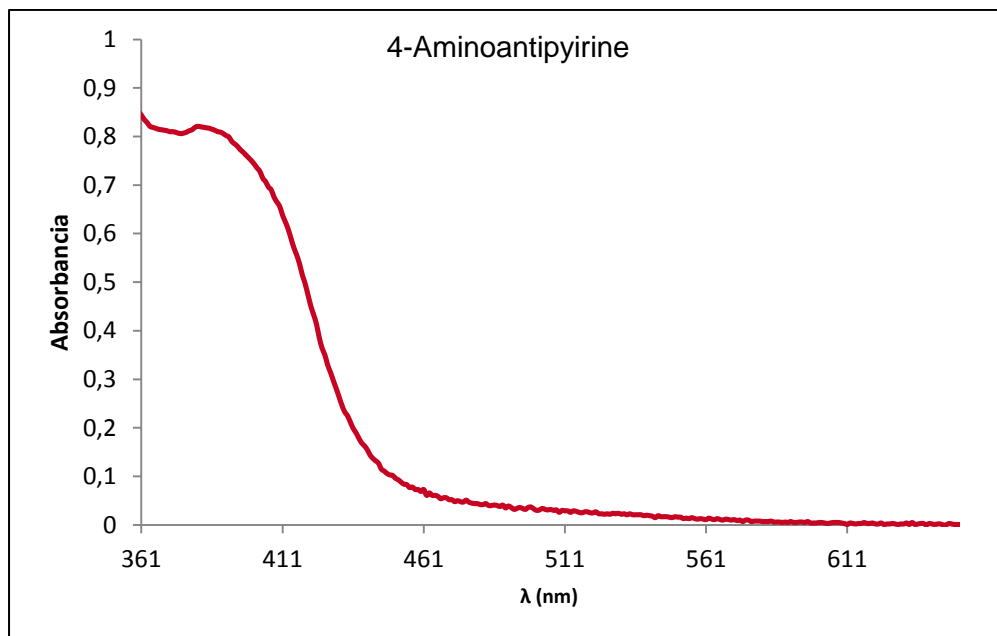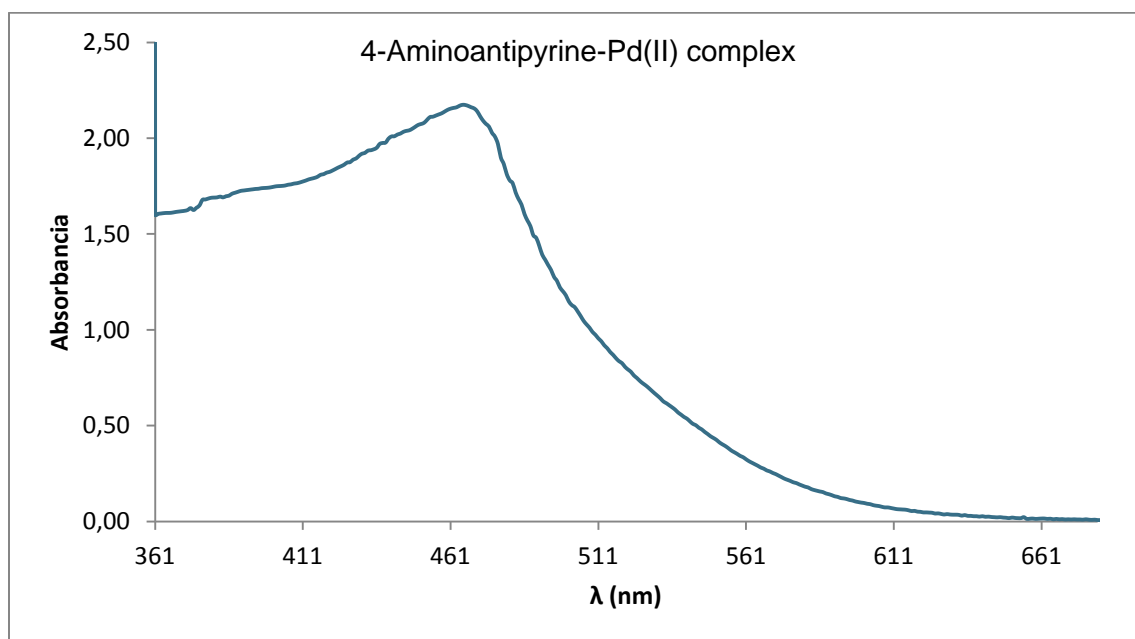

UV-Vis spectra, 1.5 mM in CH<sub>3</sub>CN

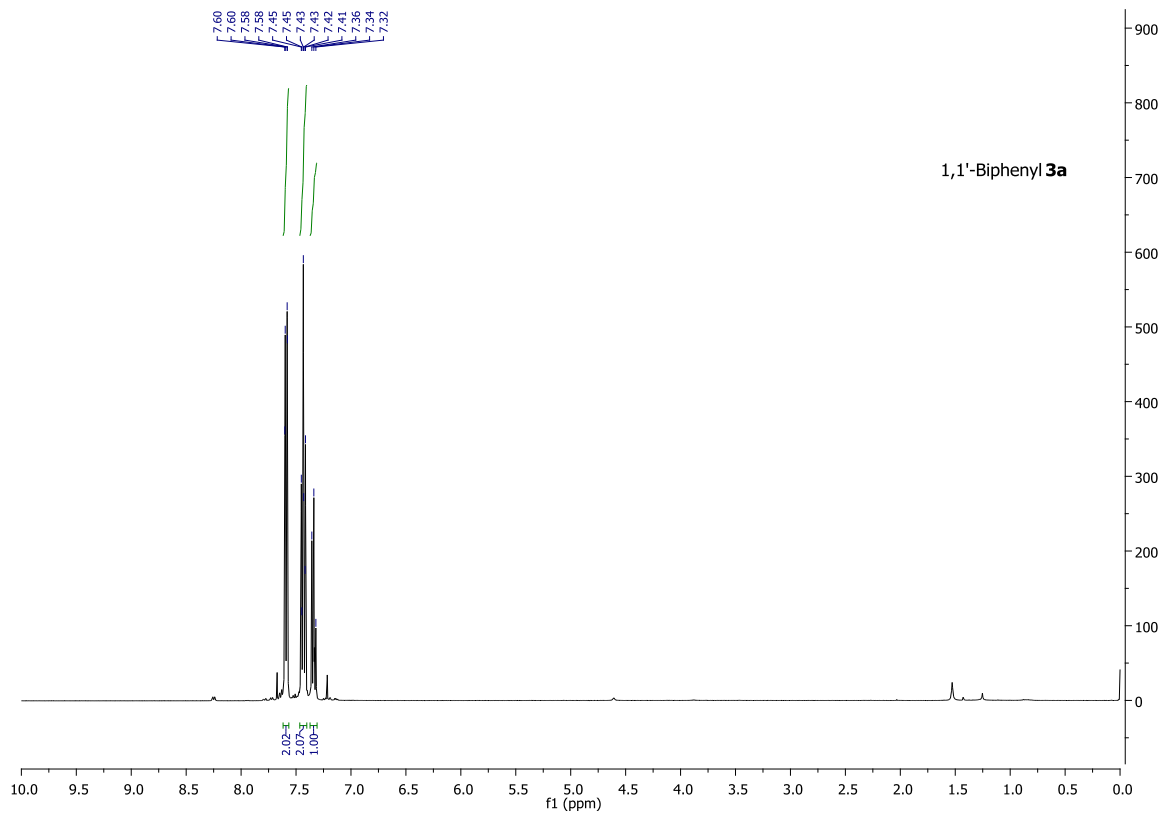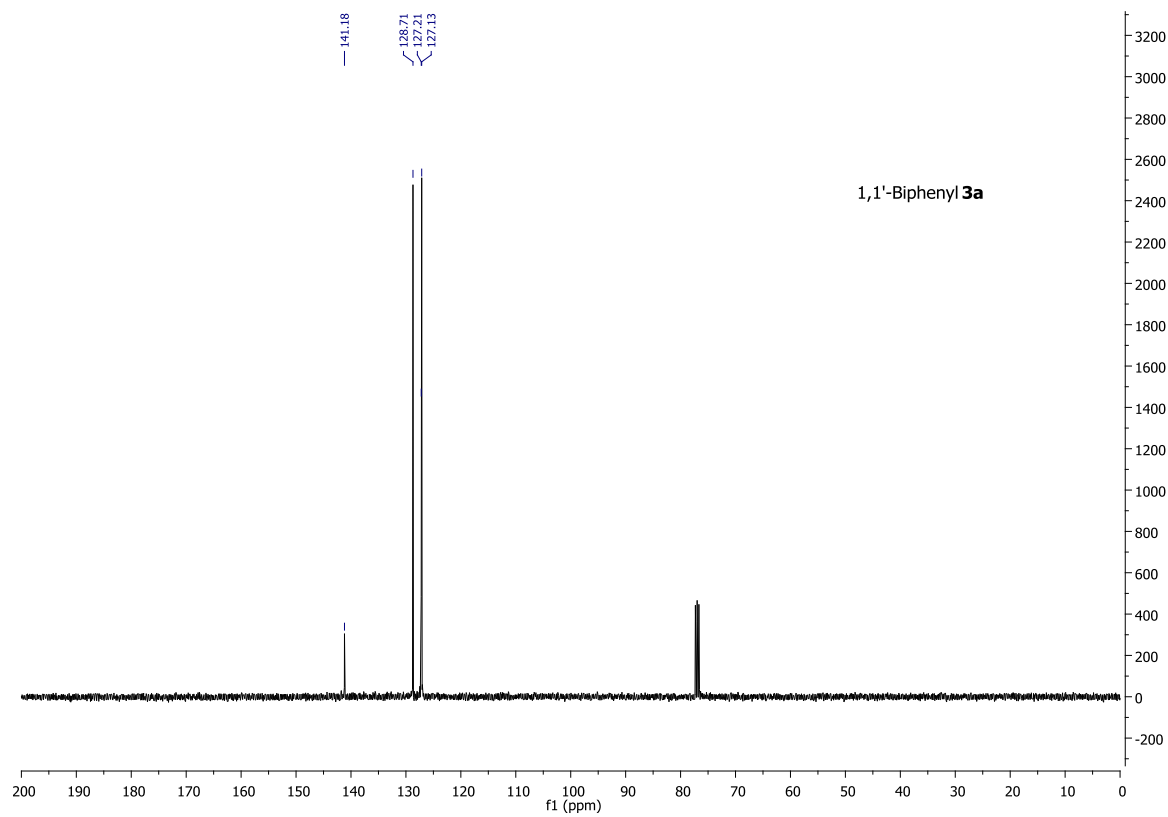

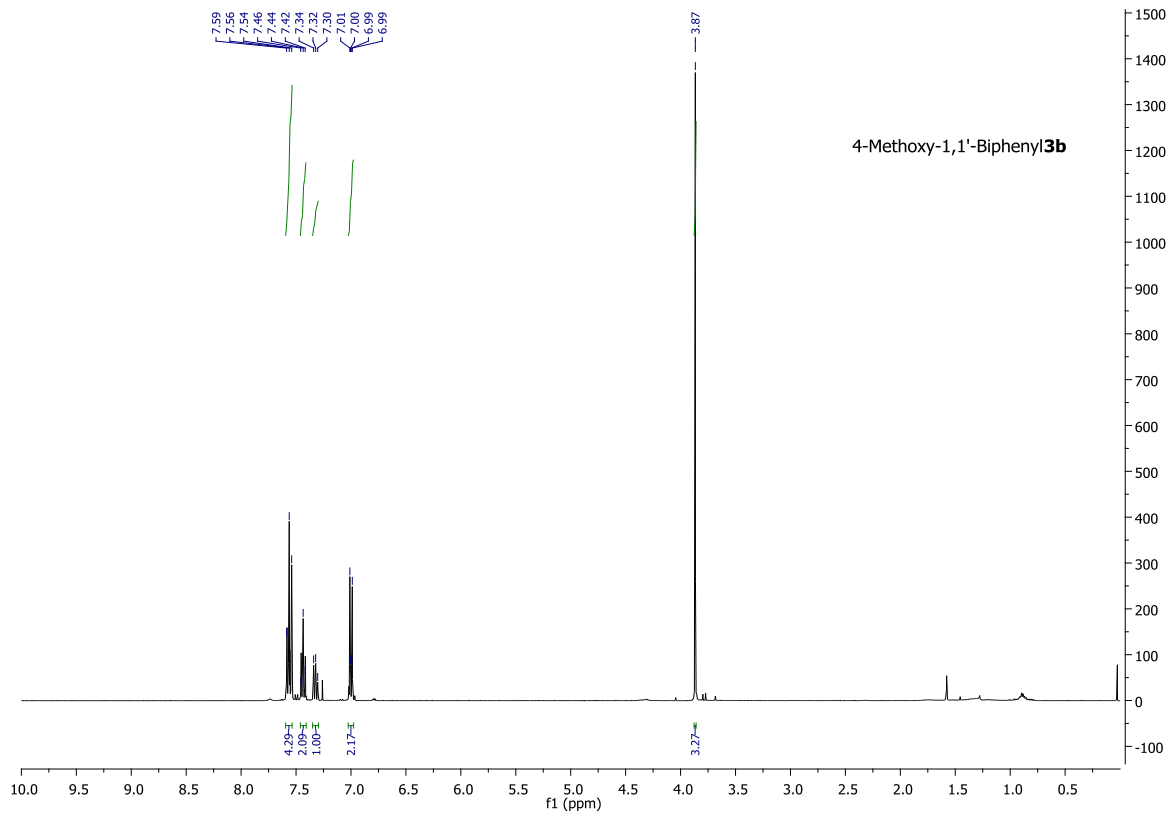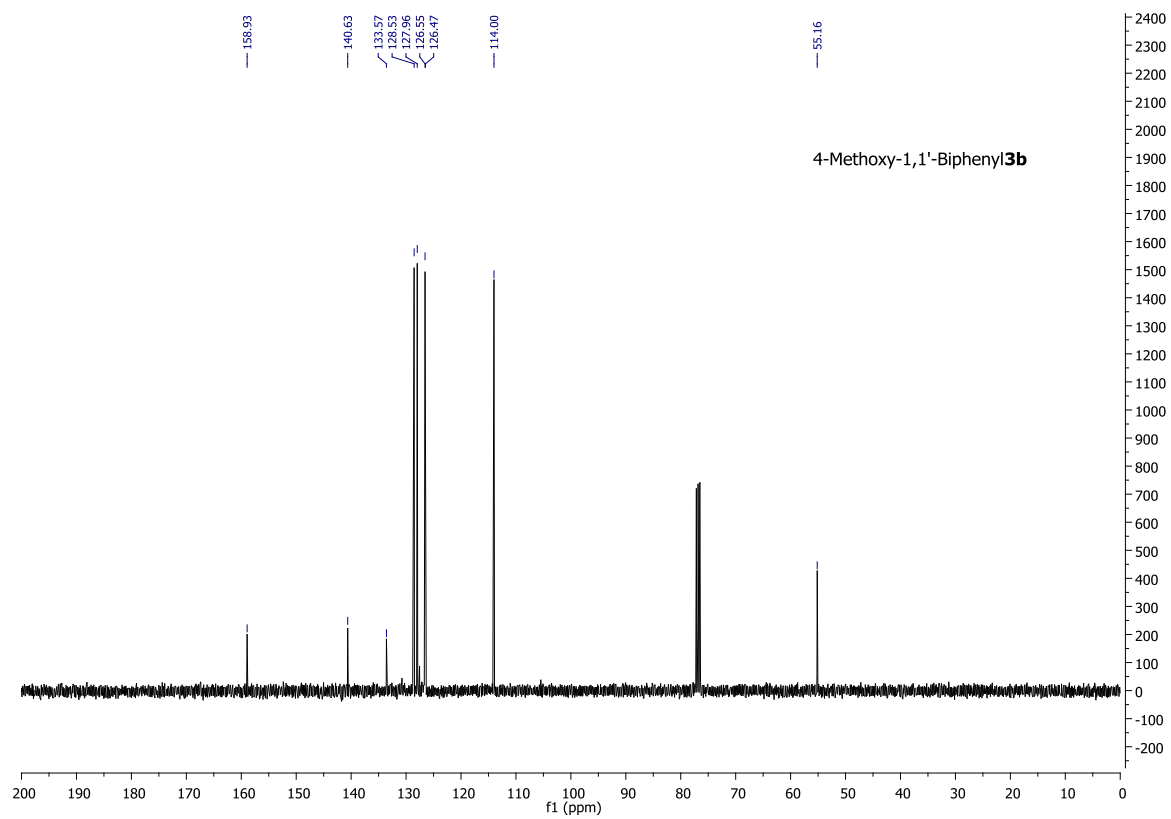



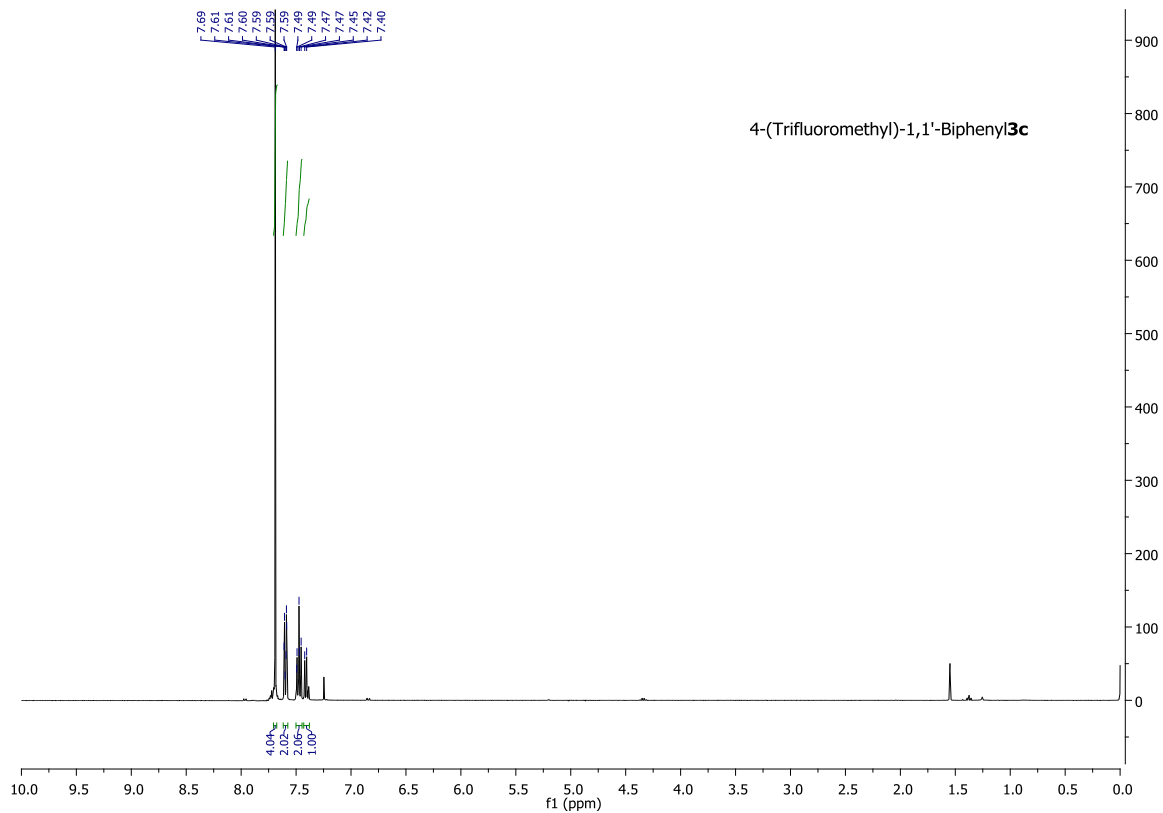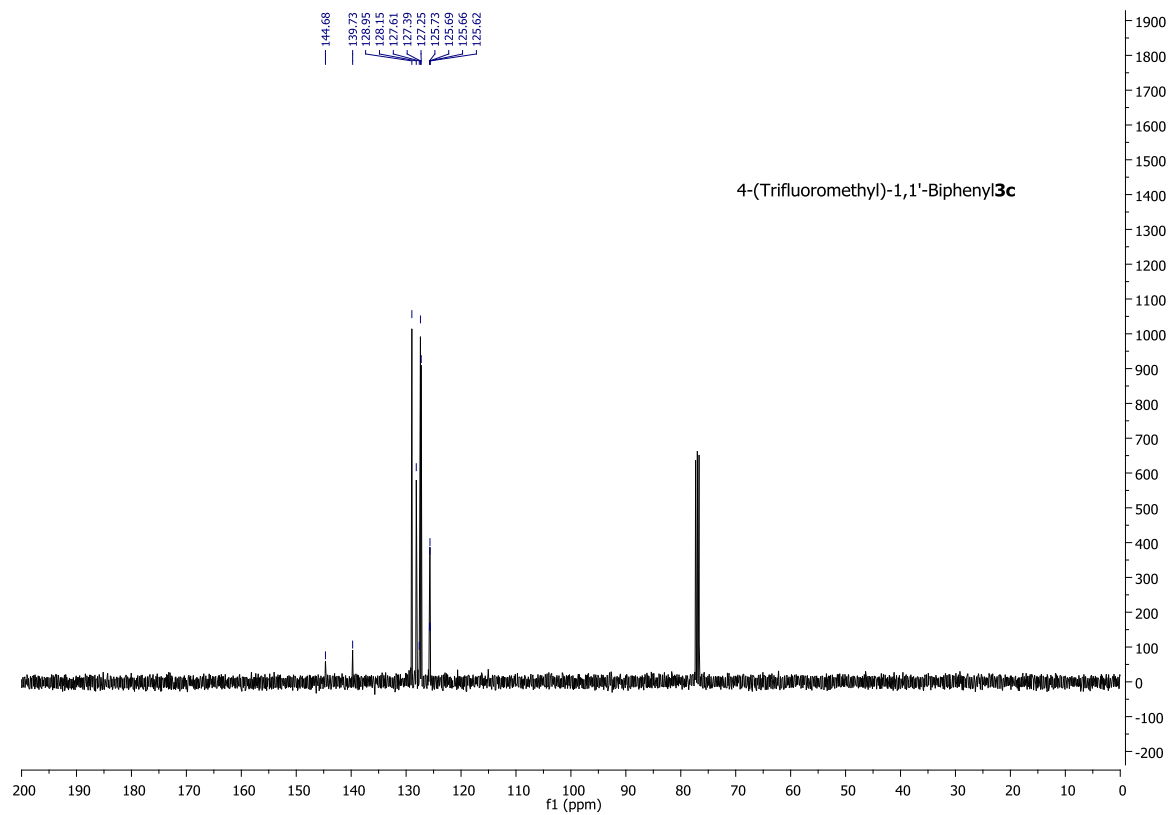

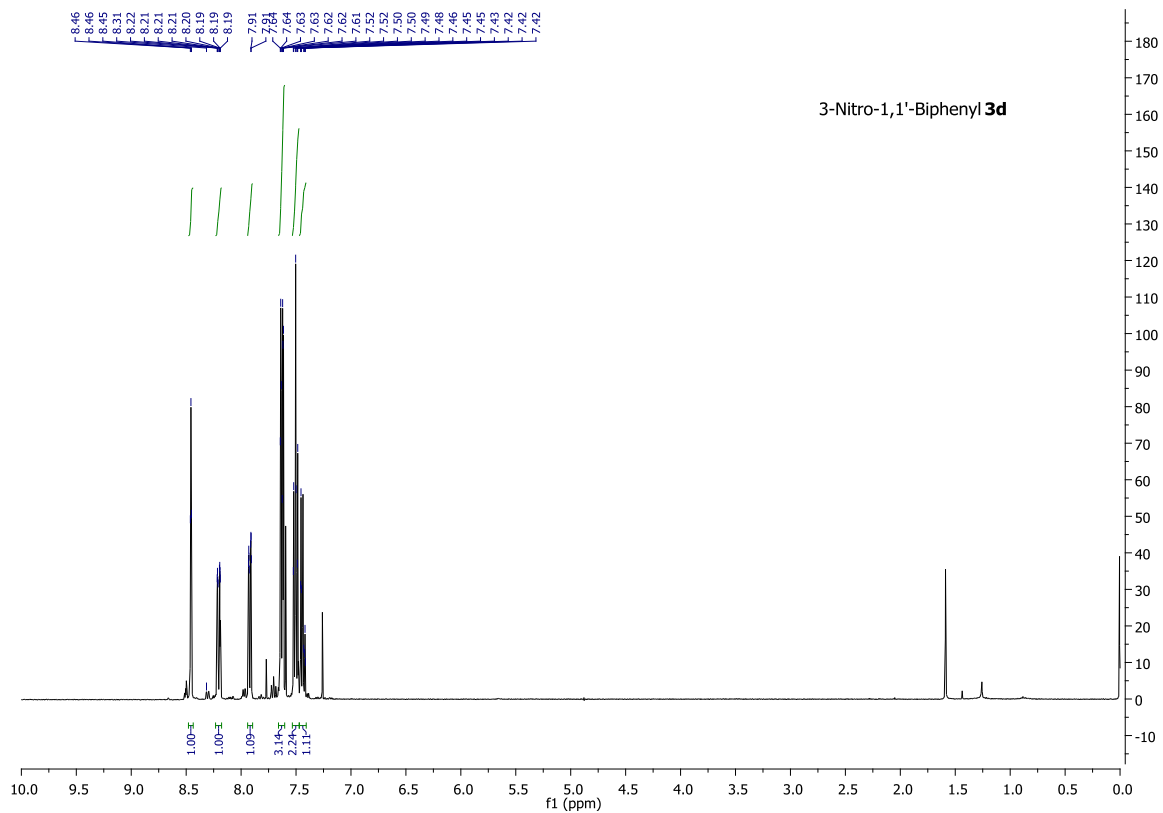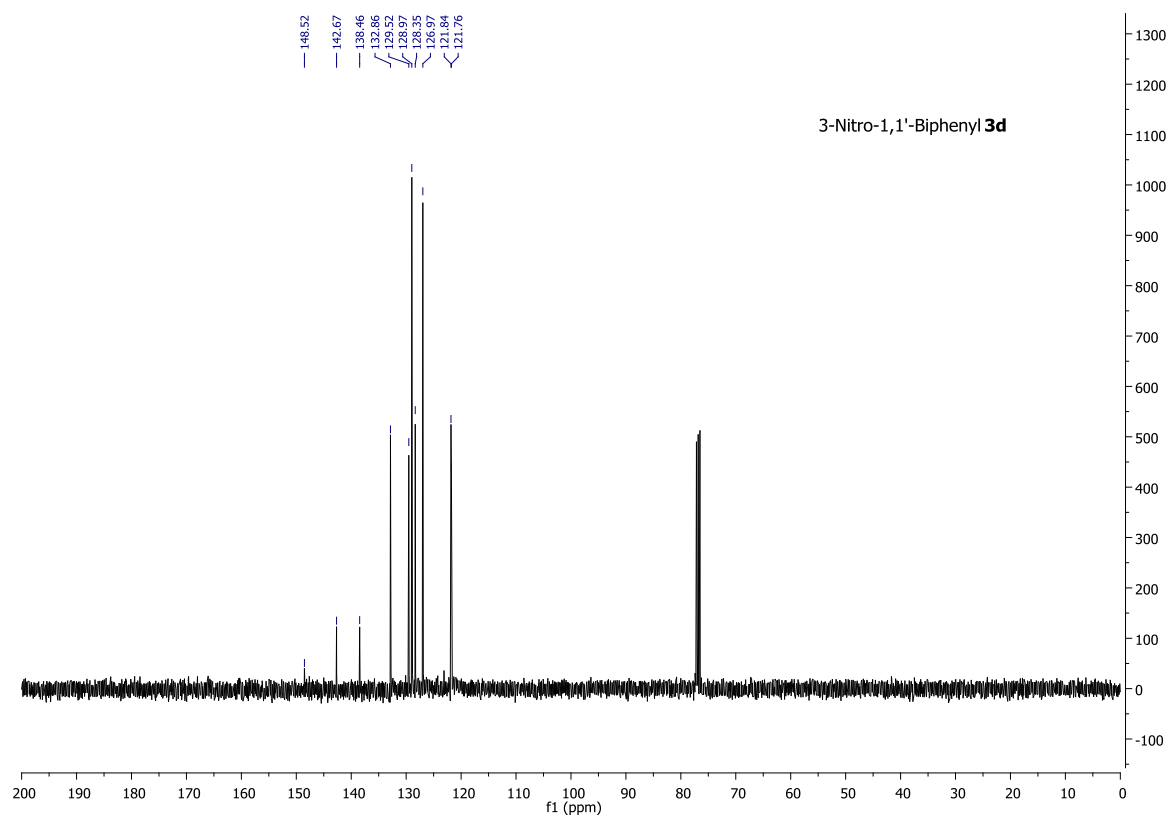

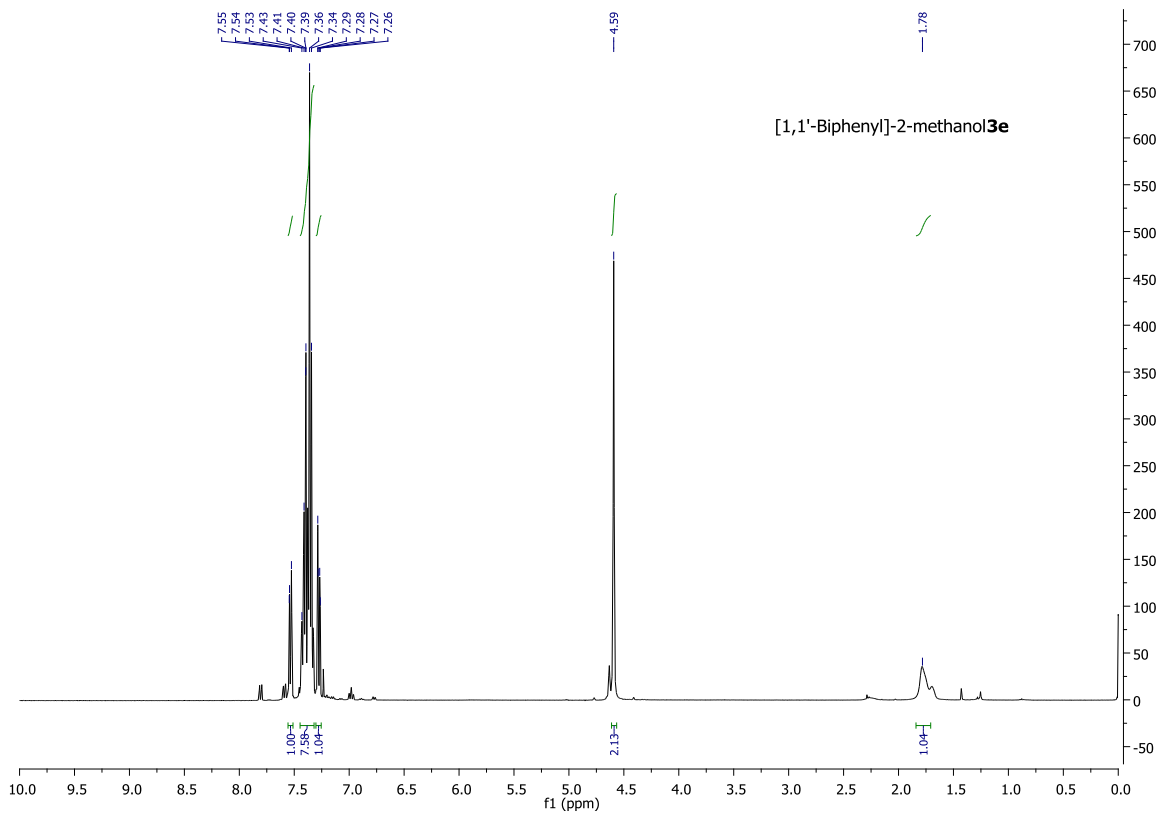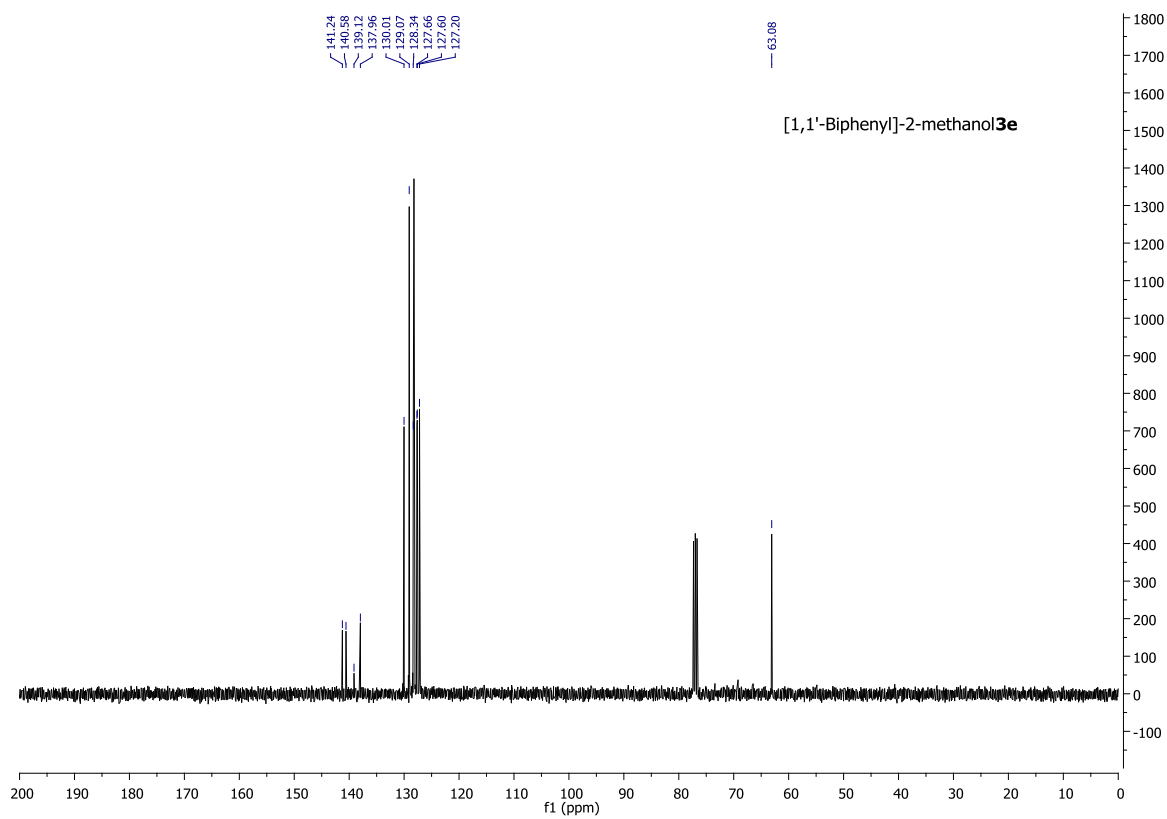

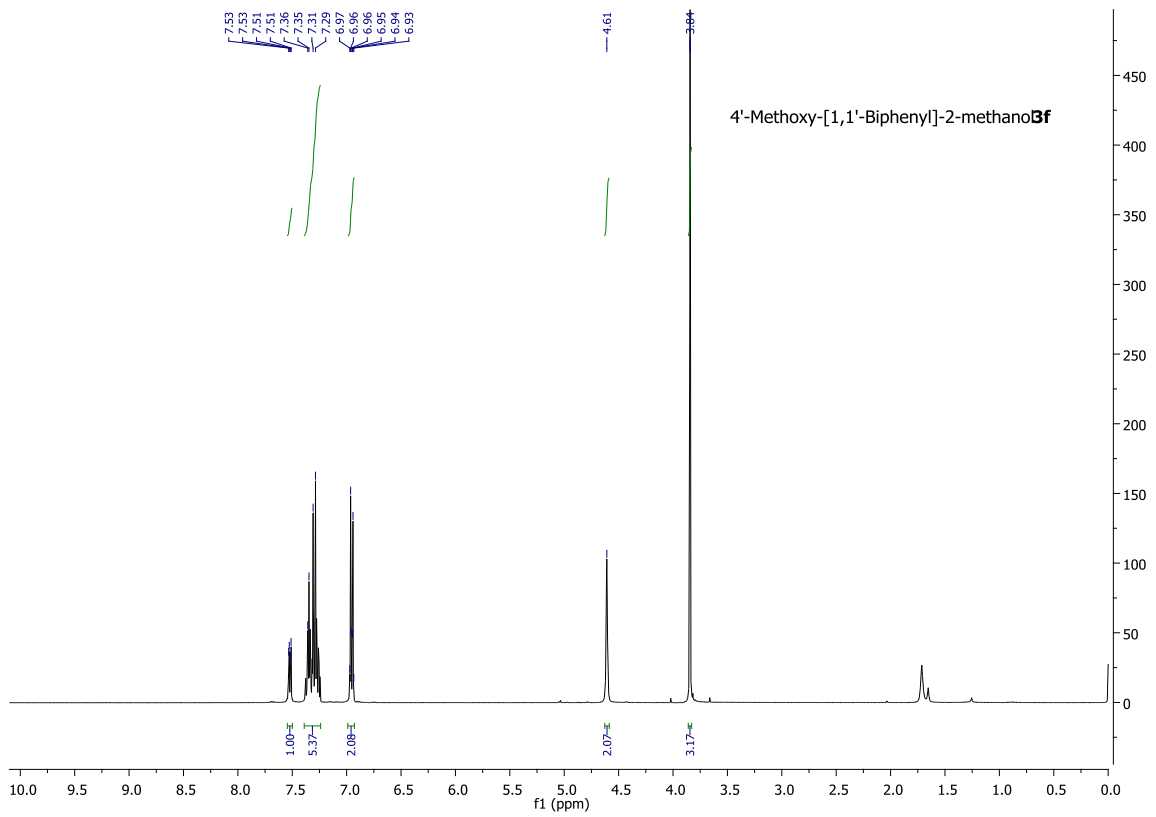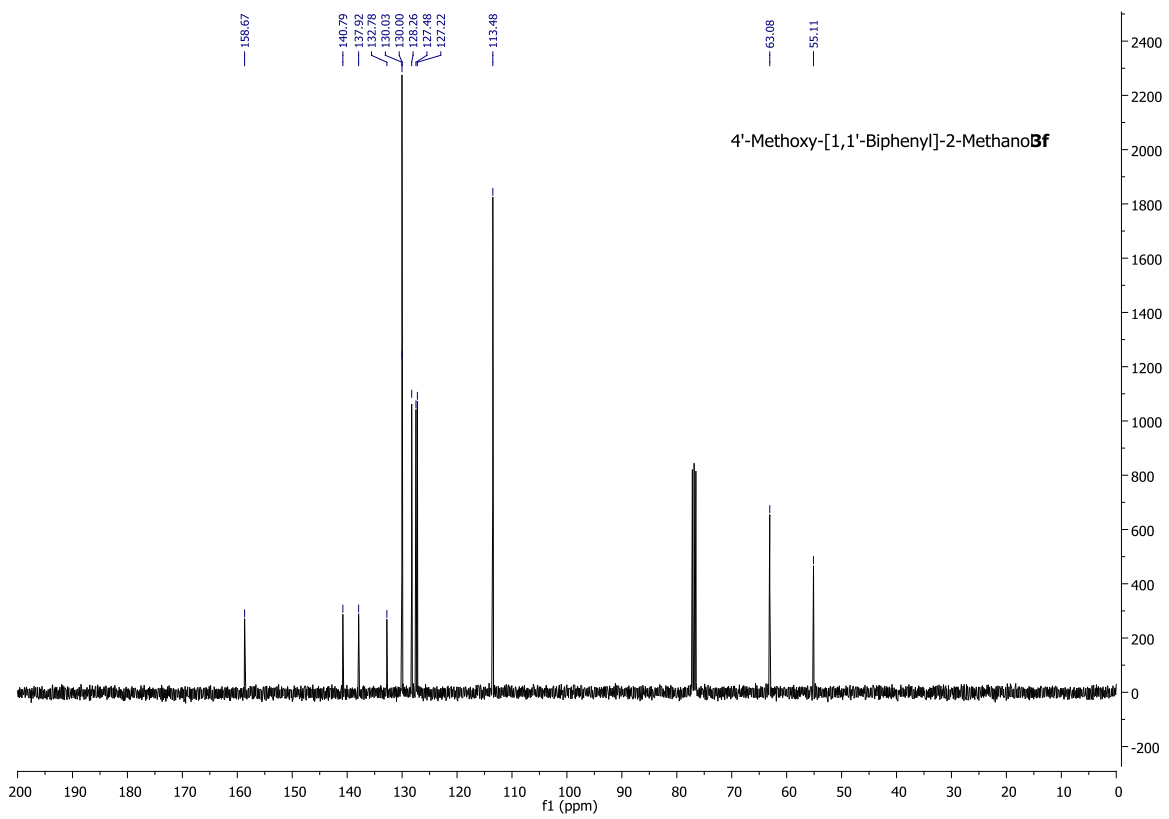

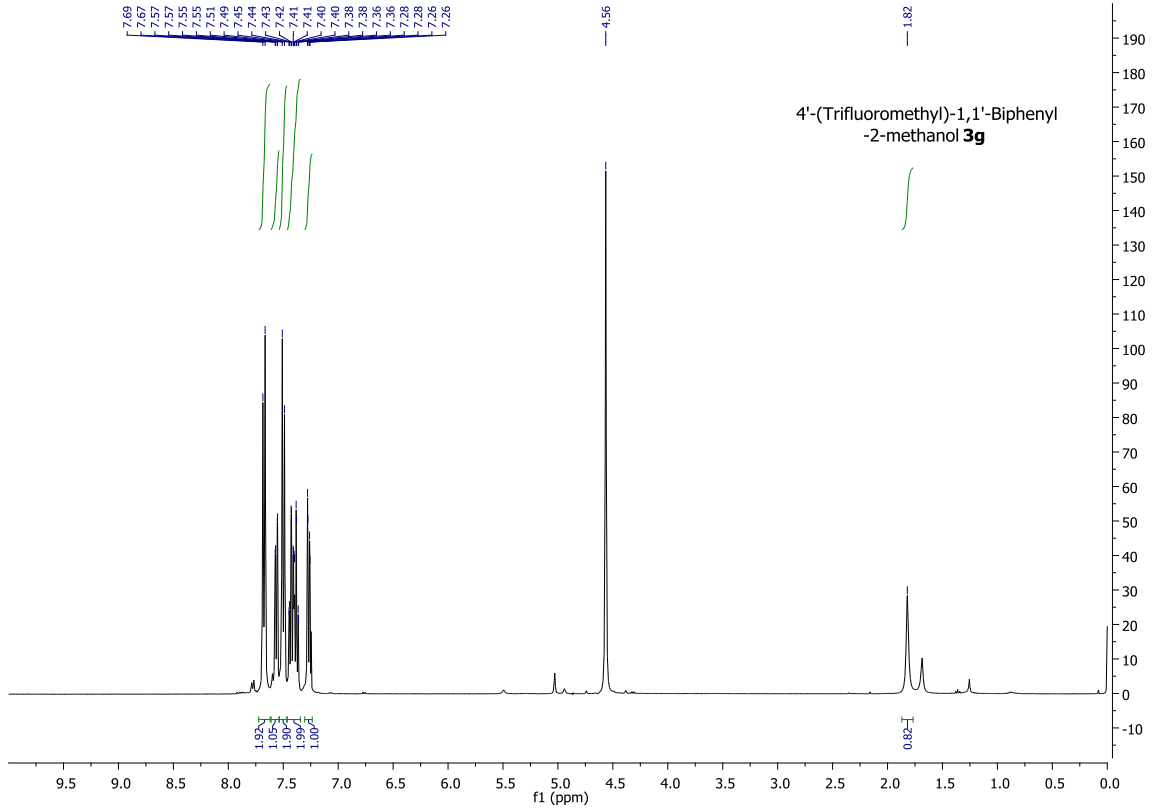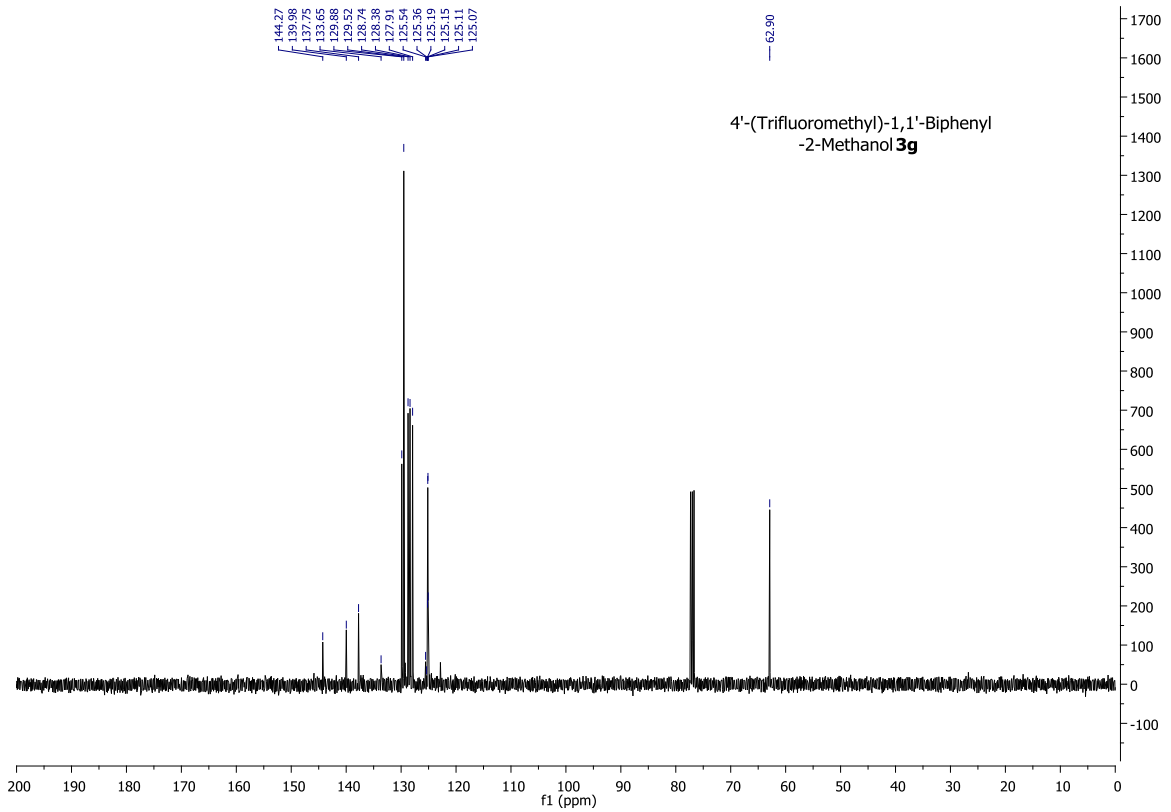

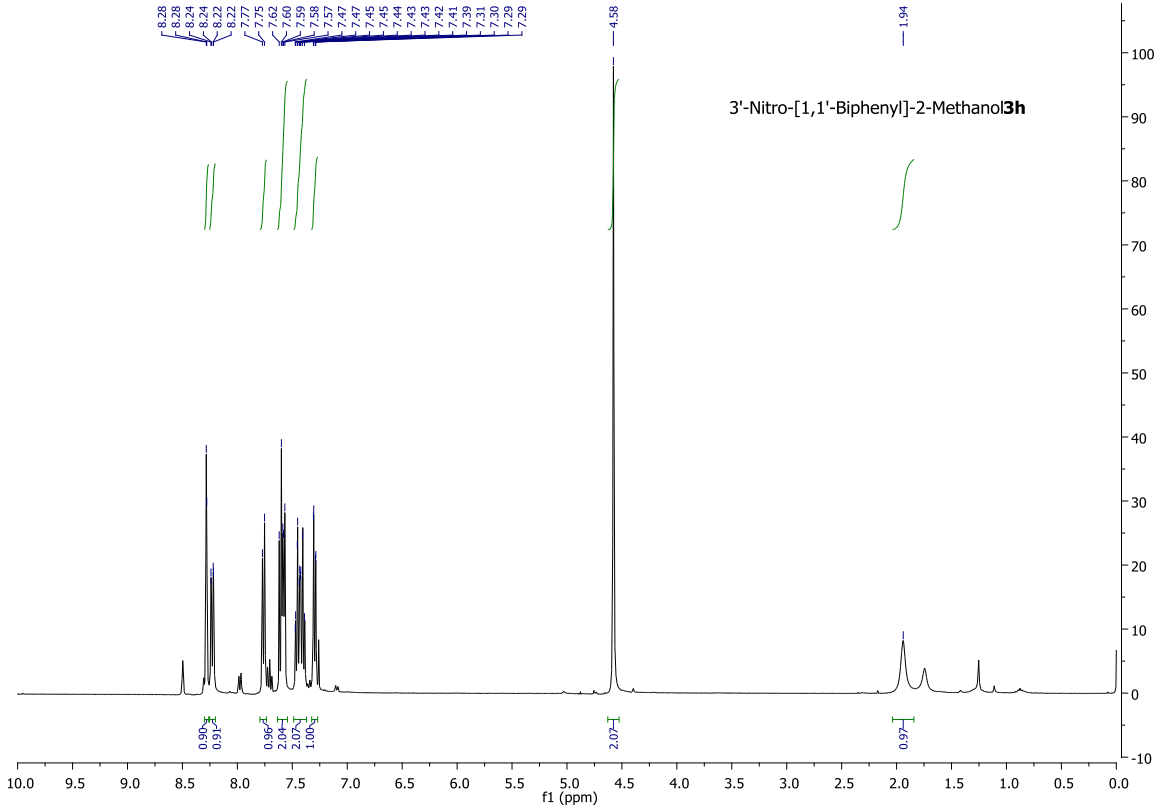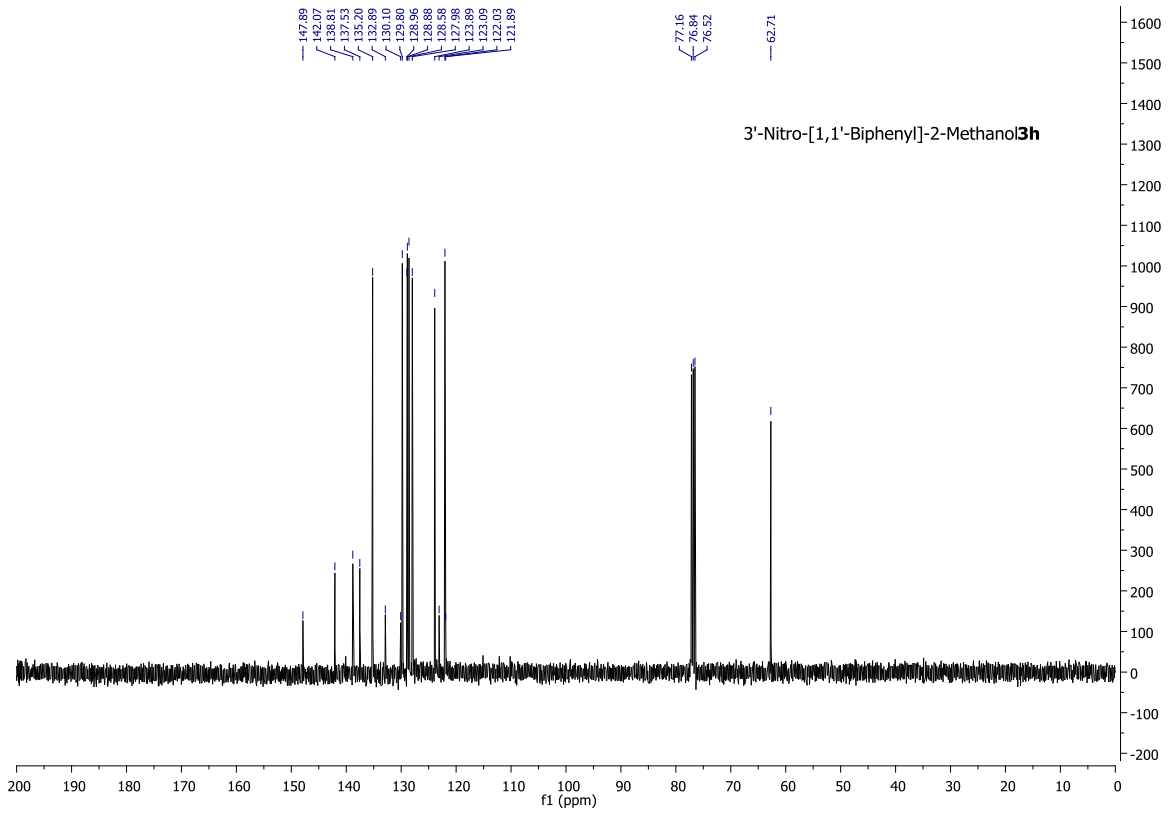

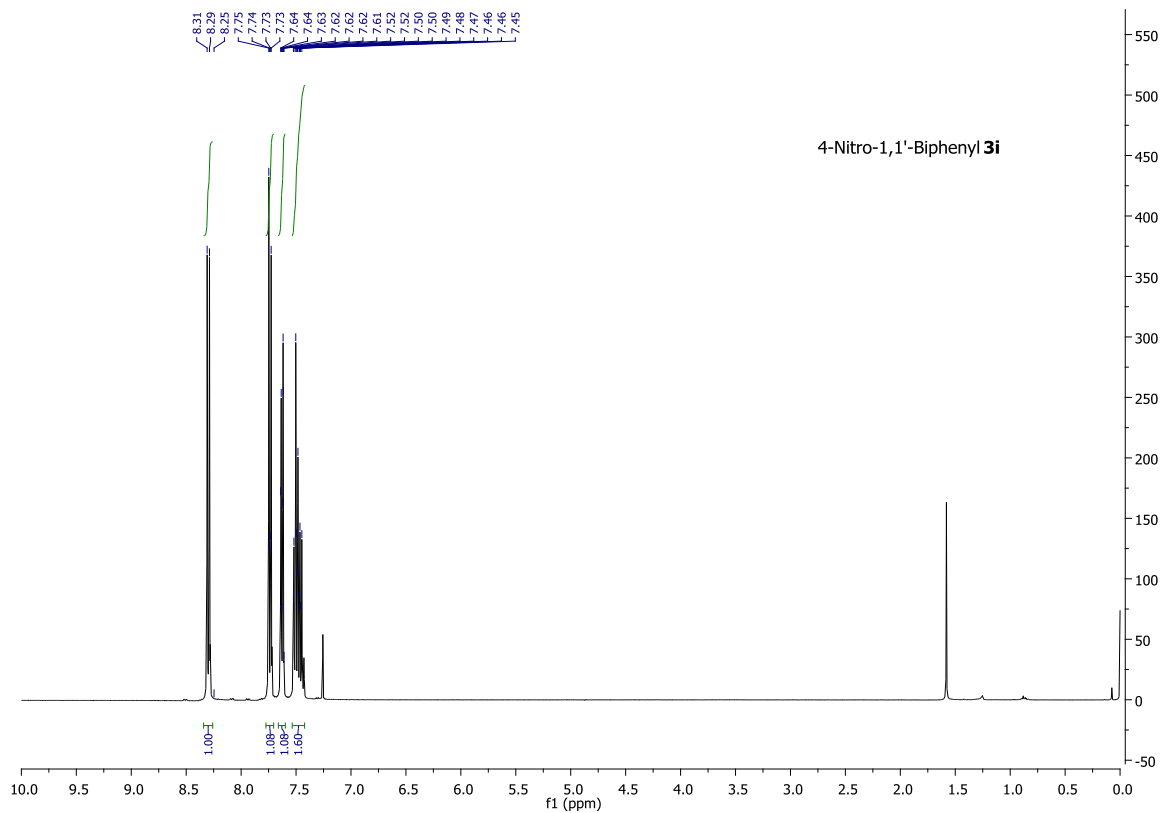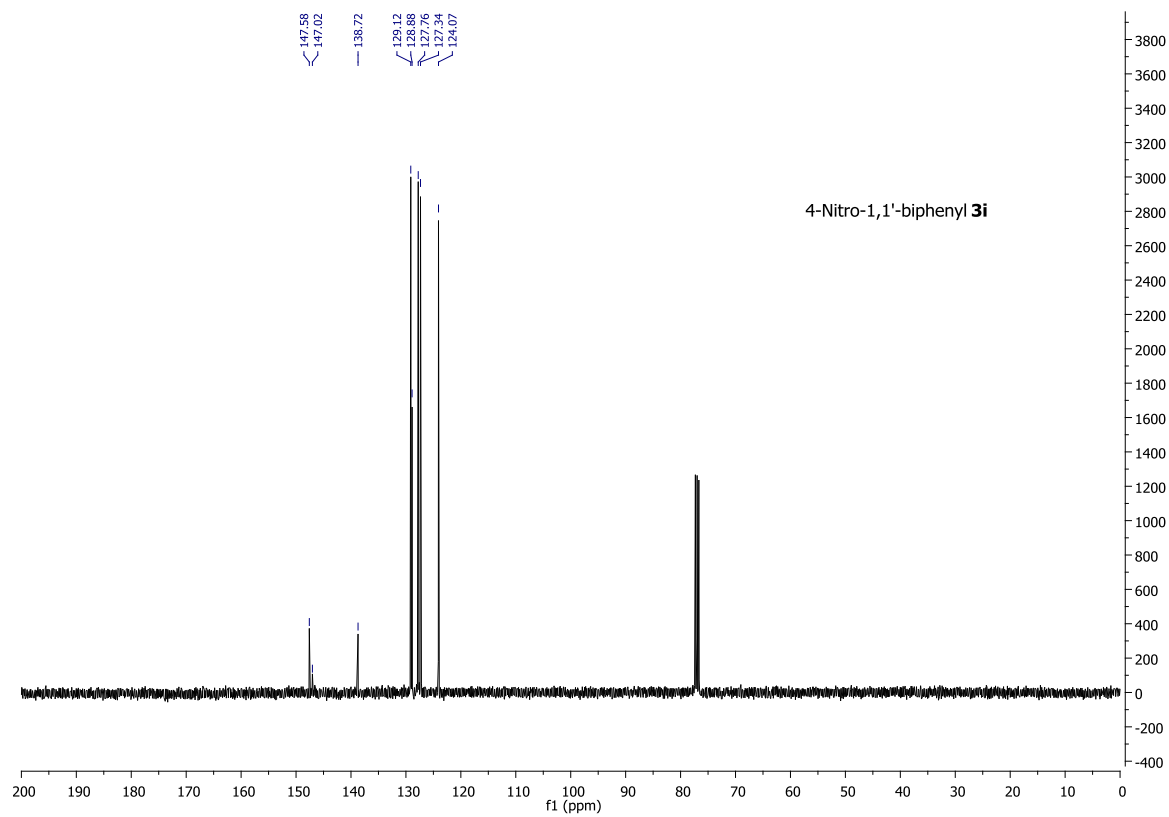

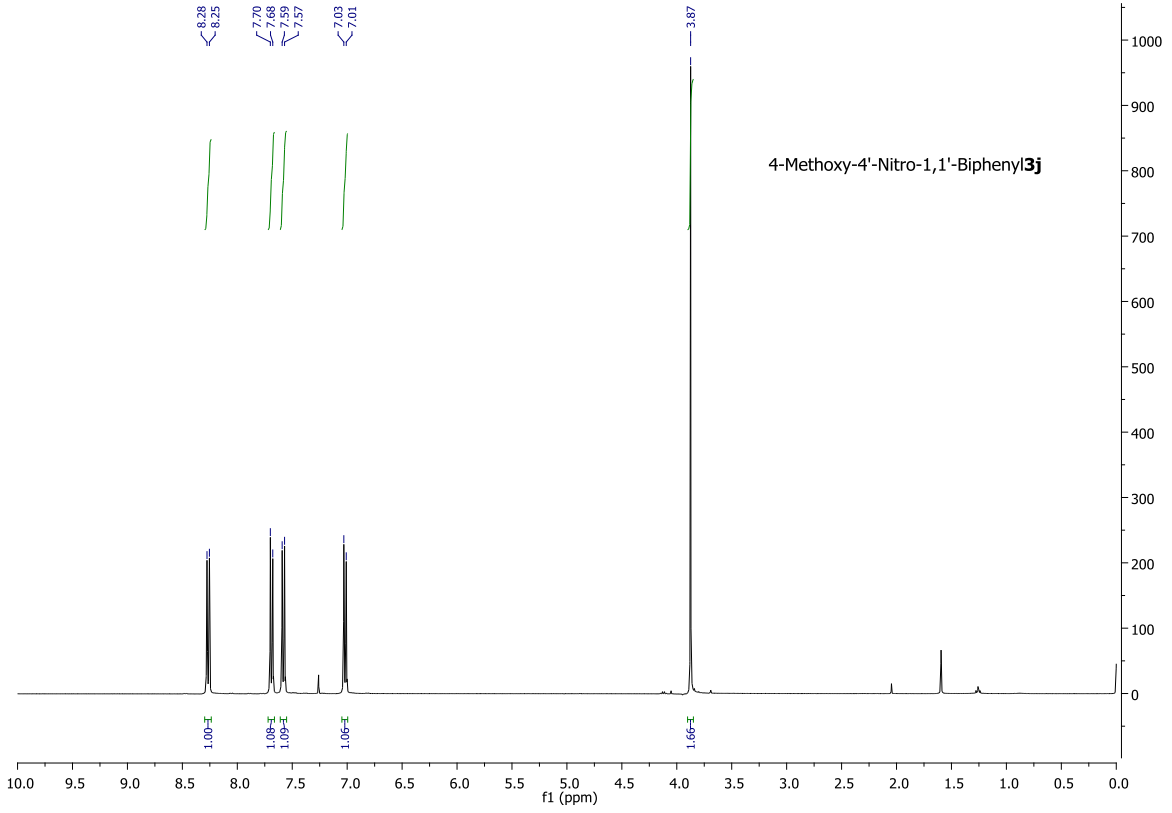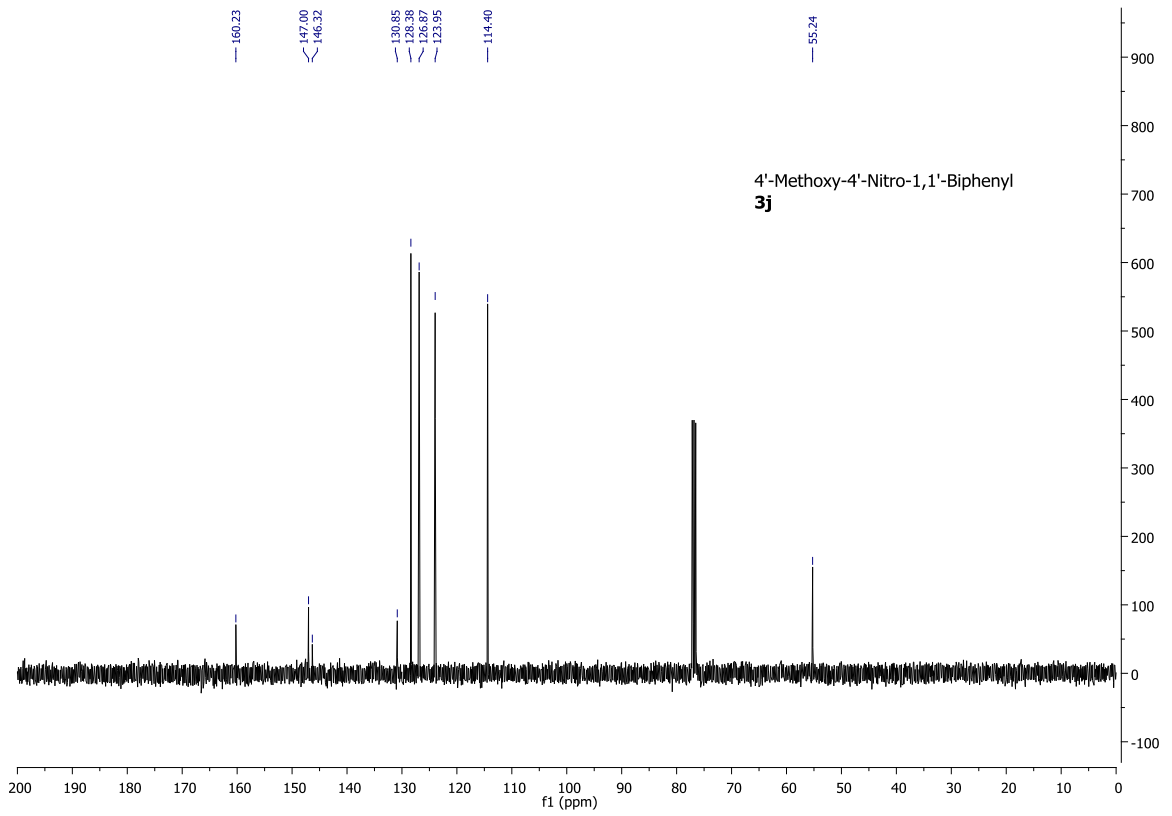



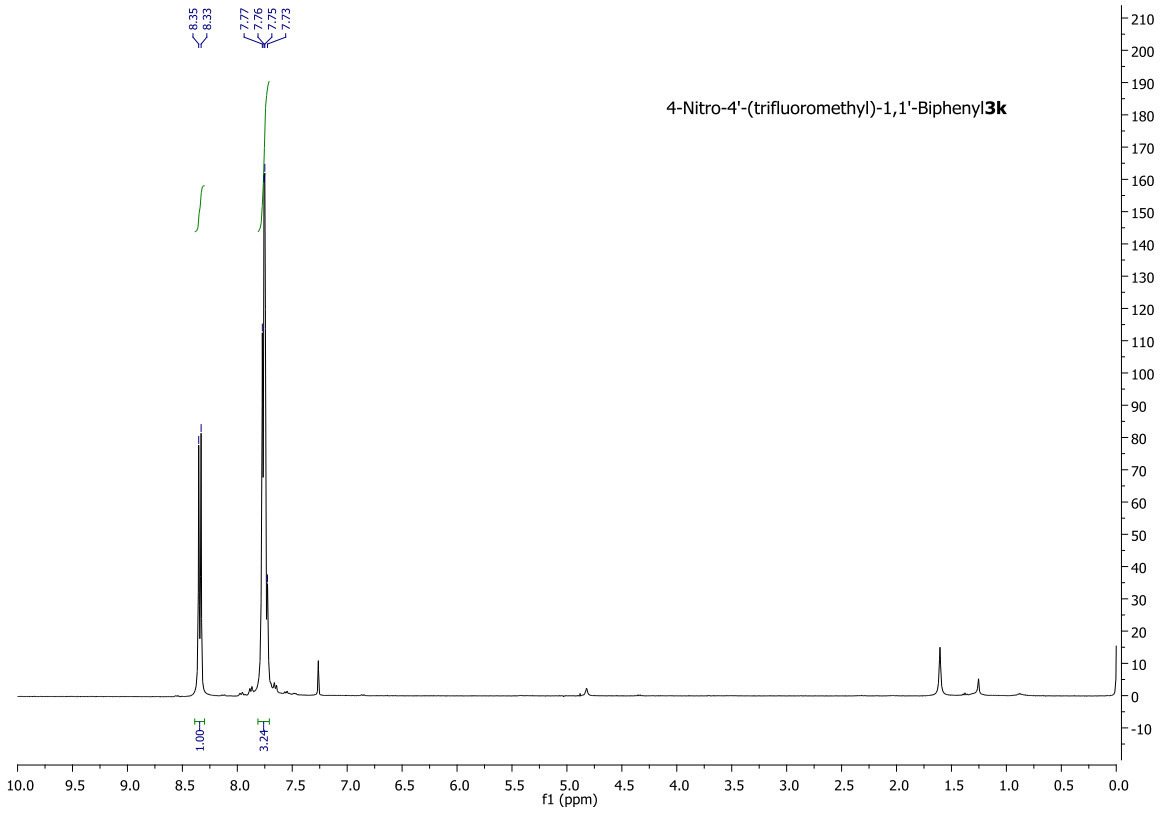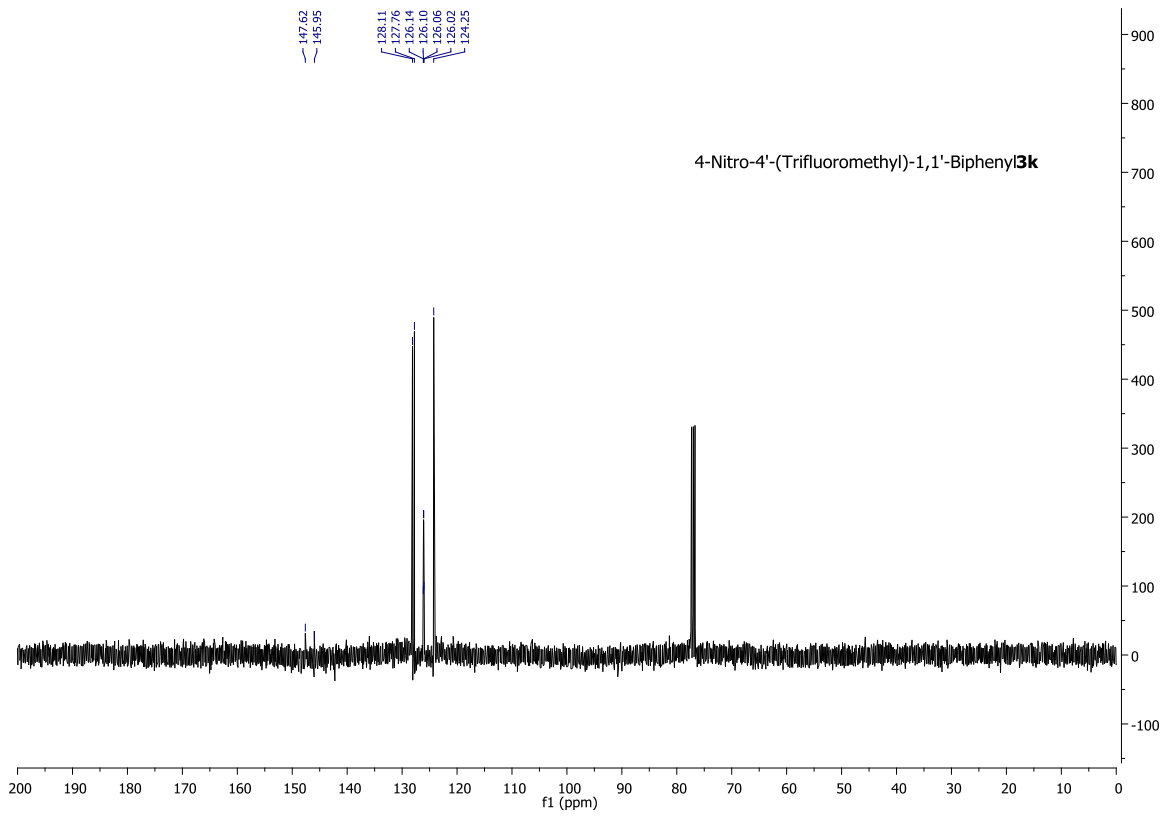

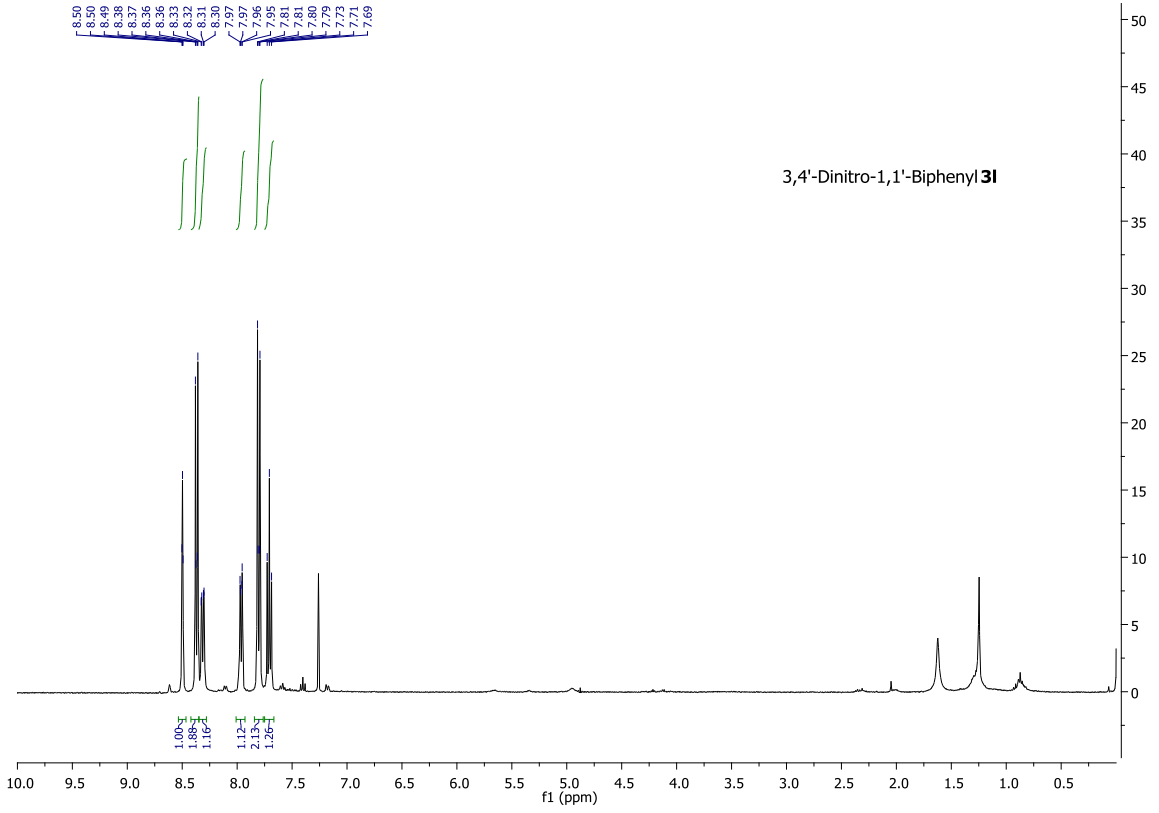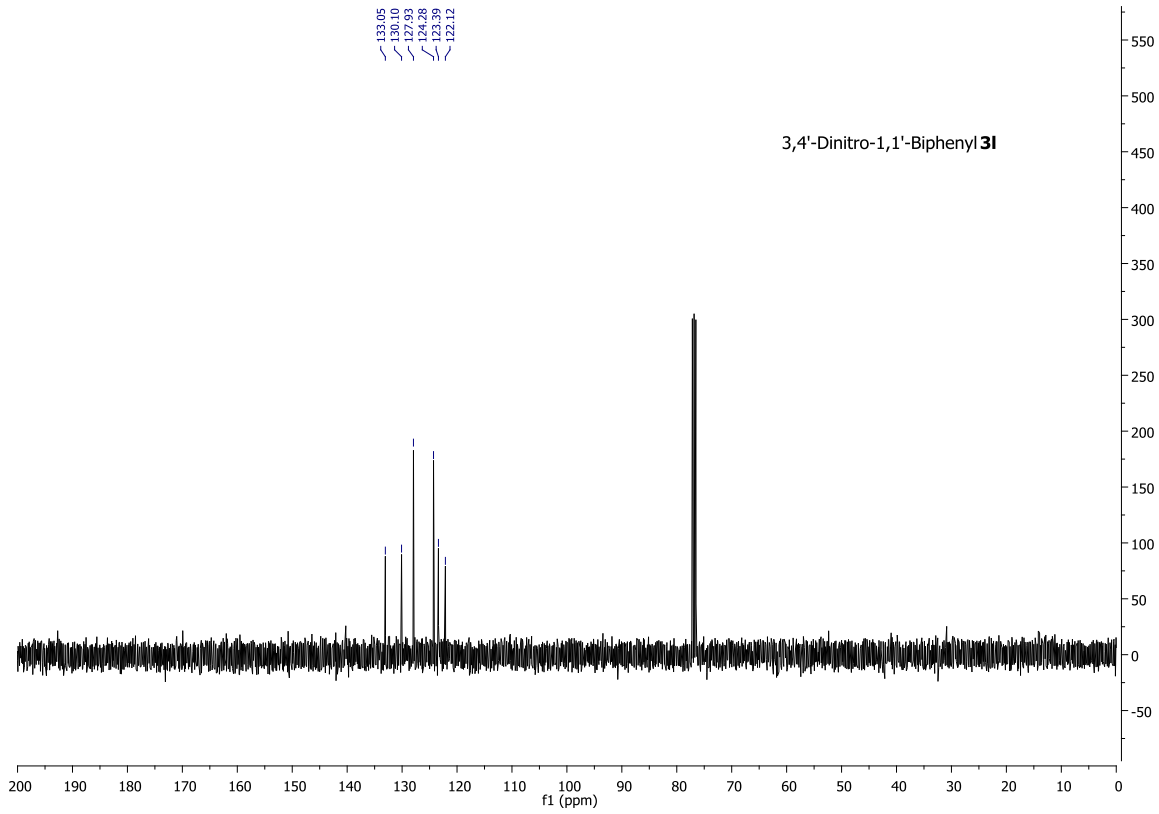

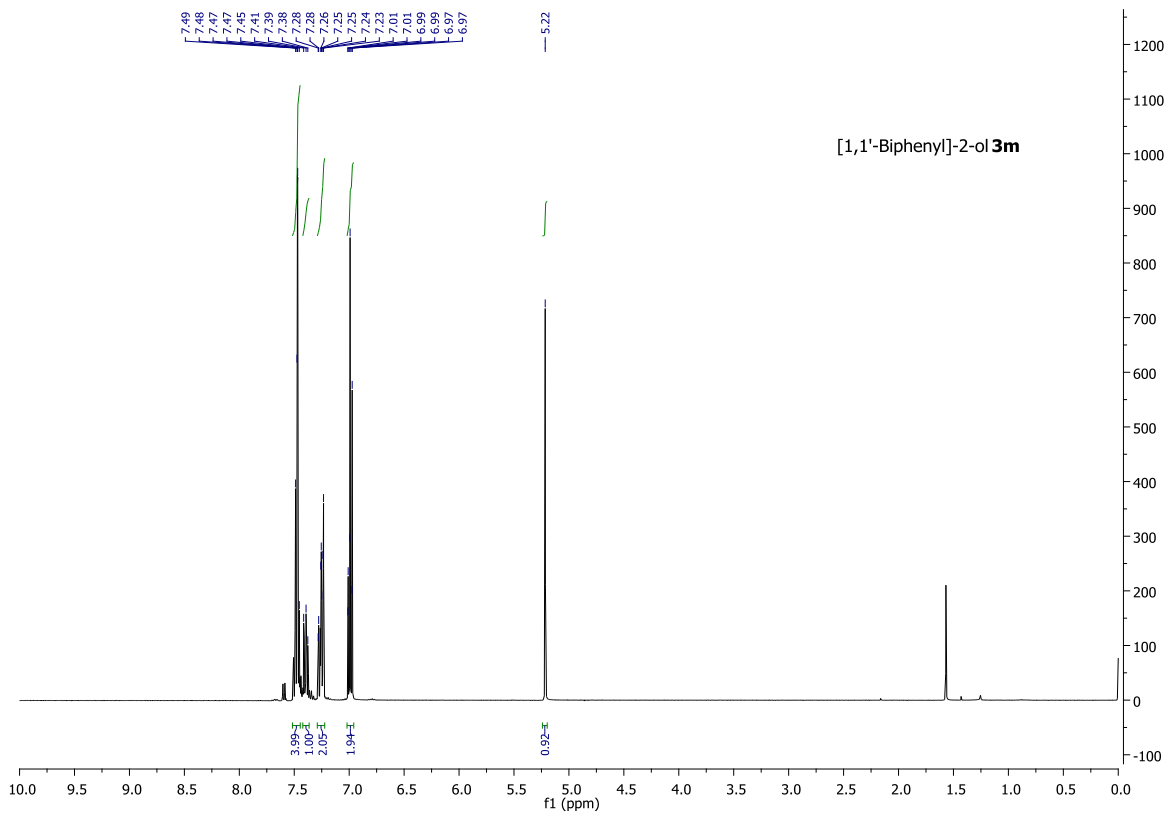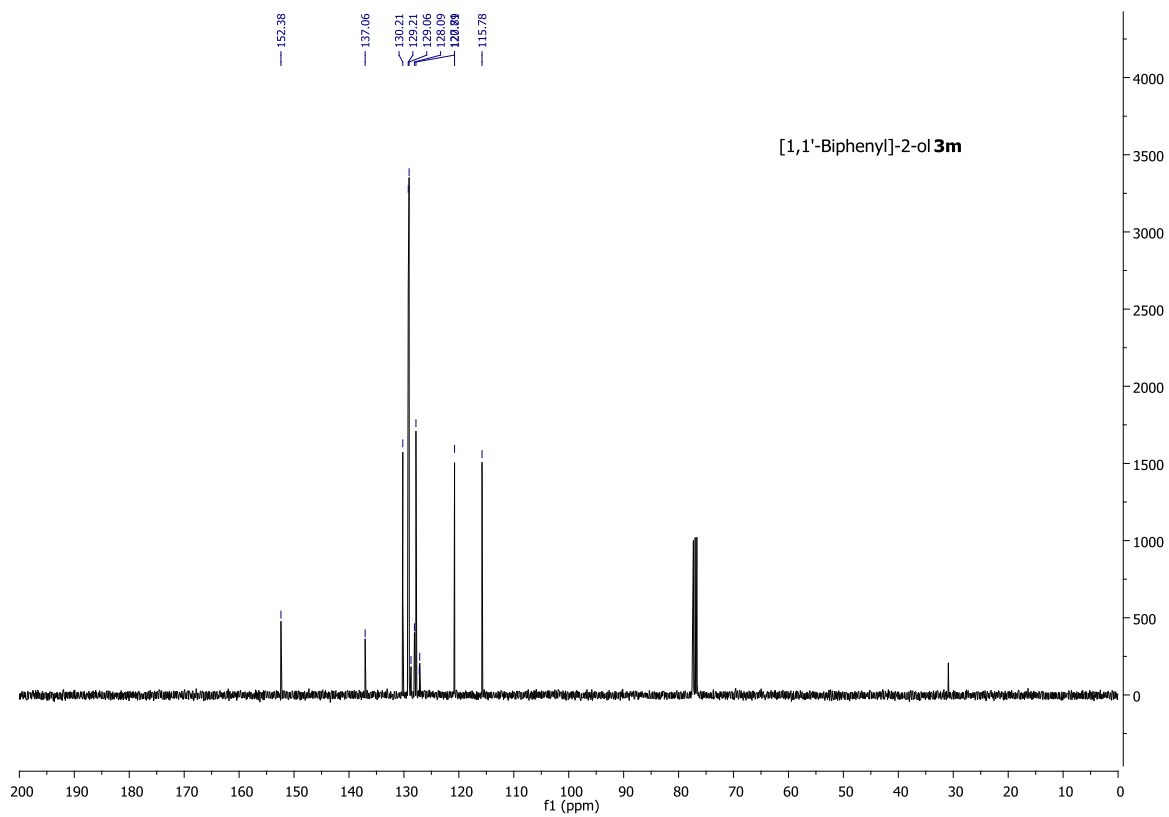

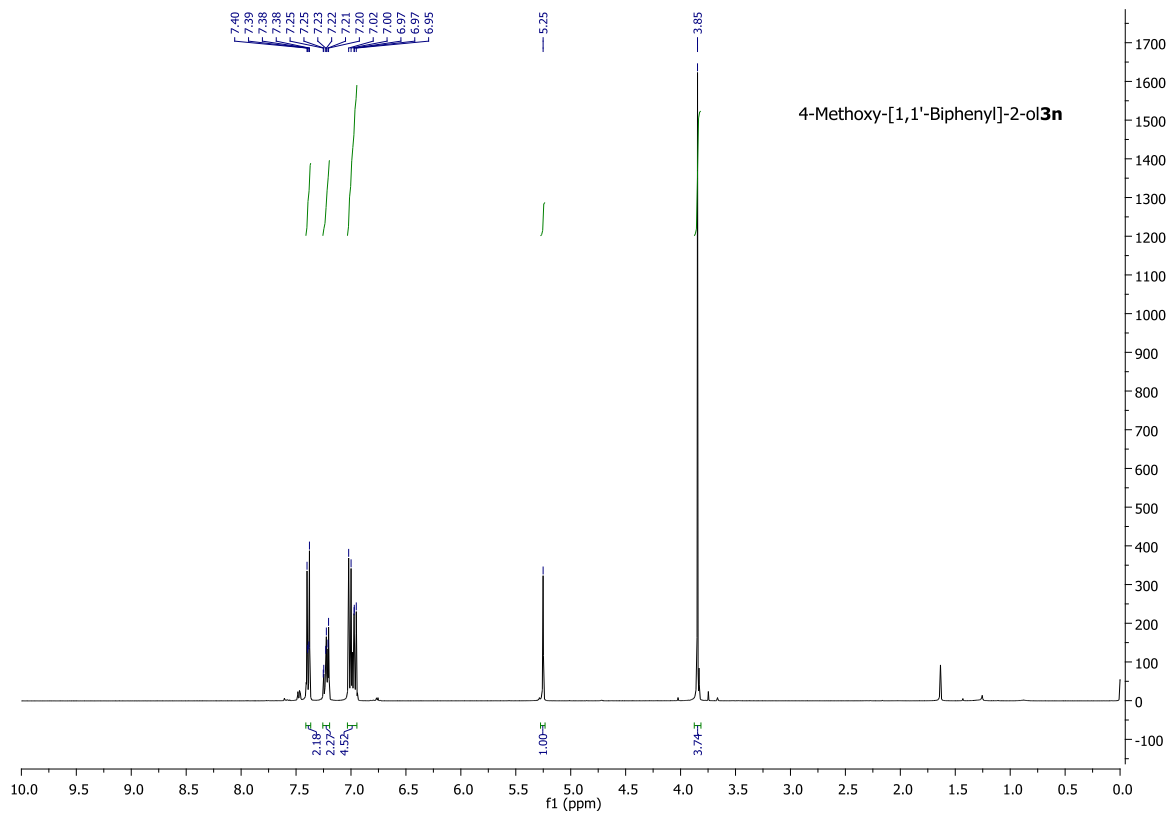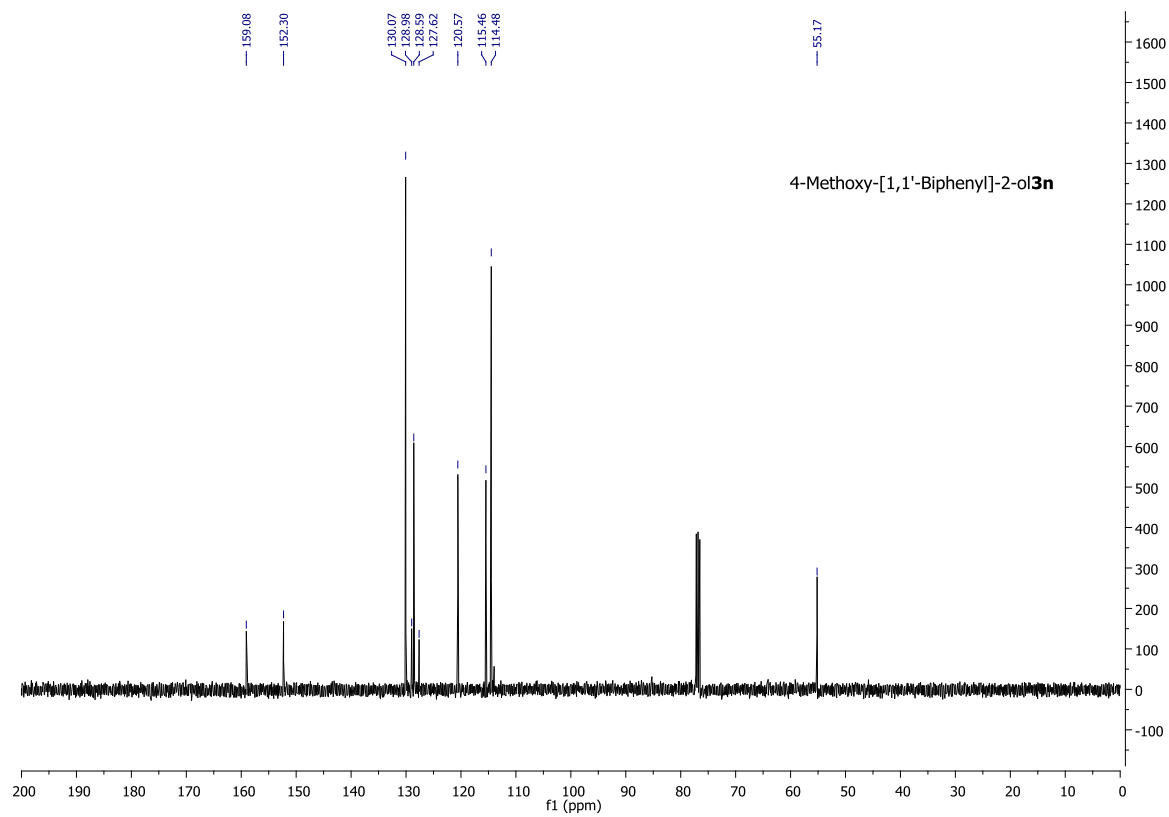

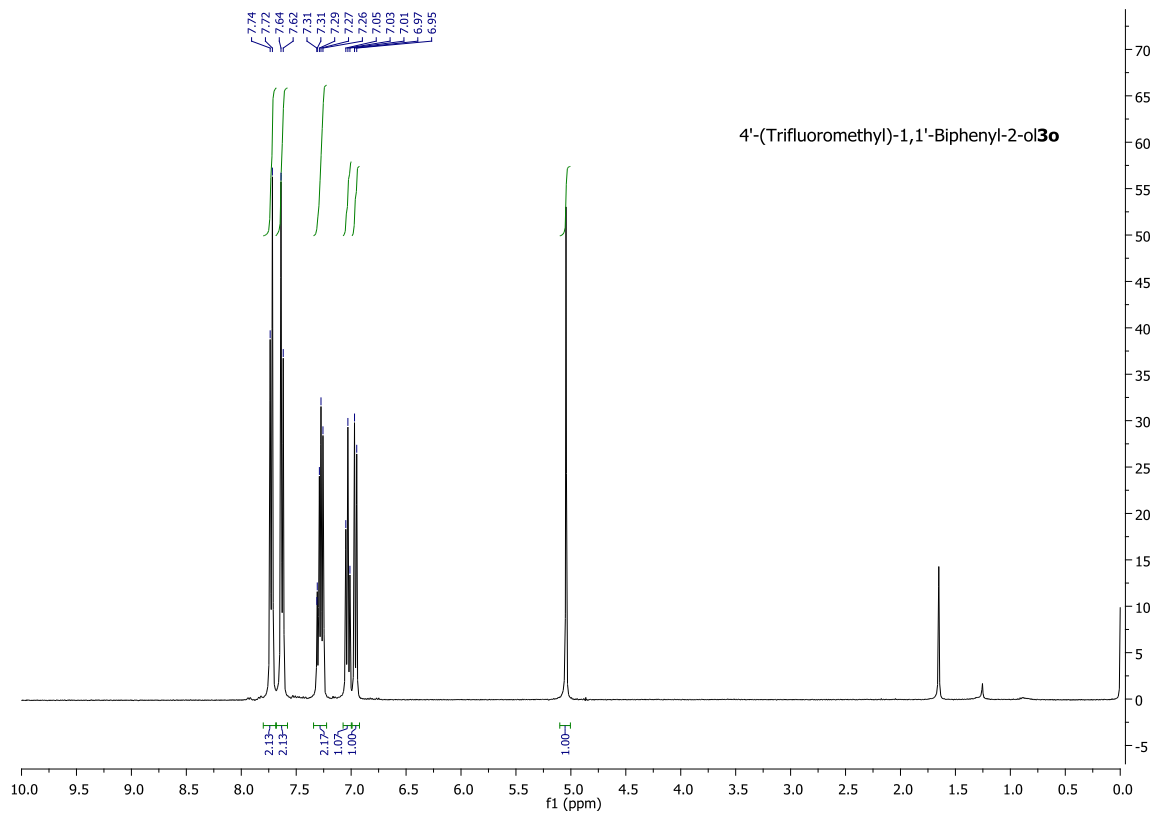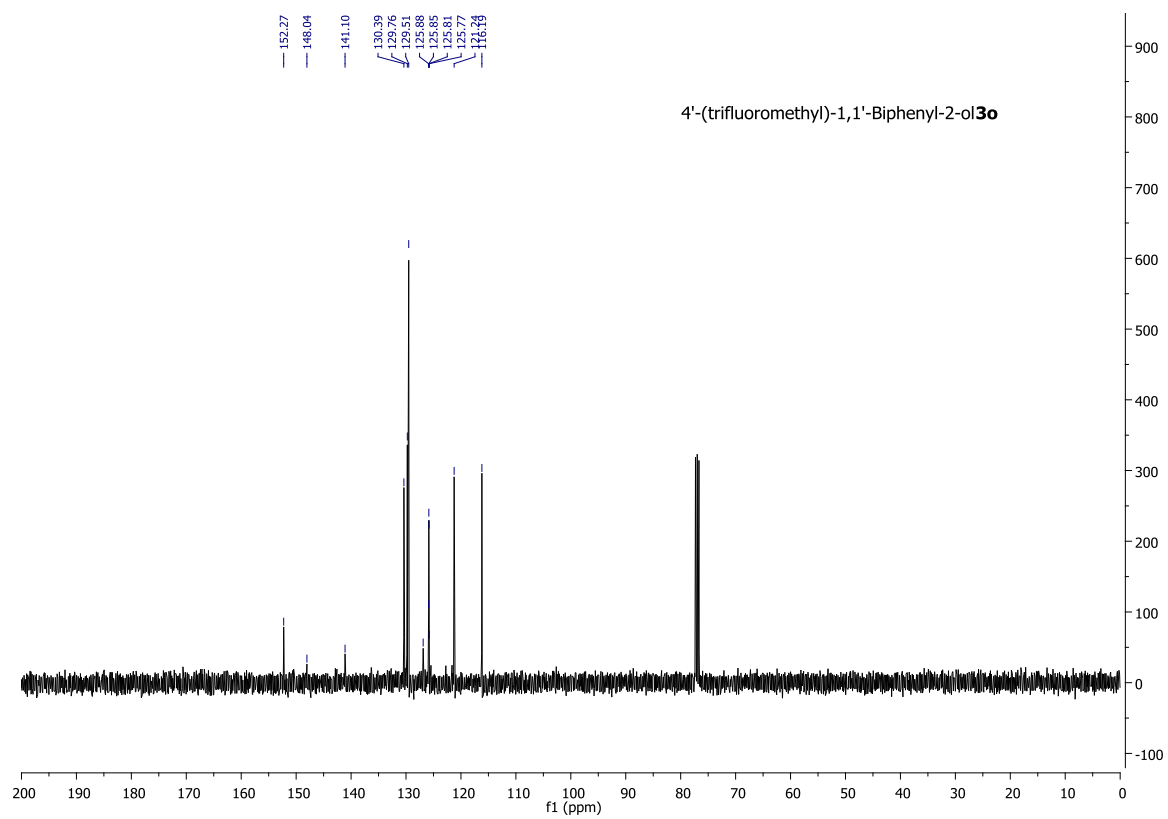

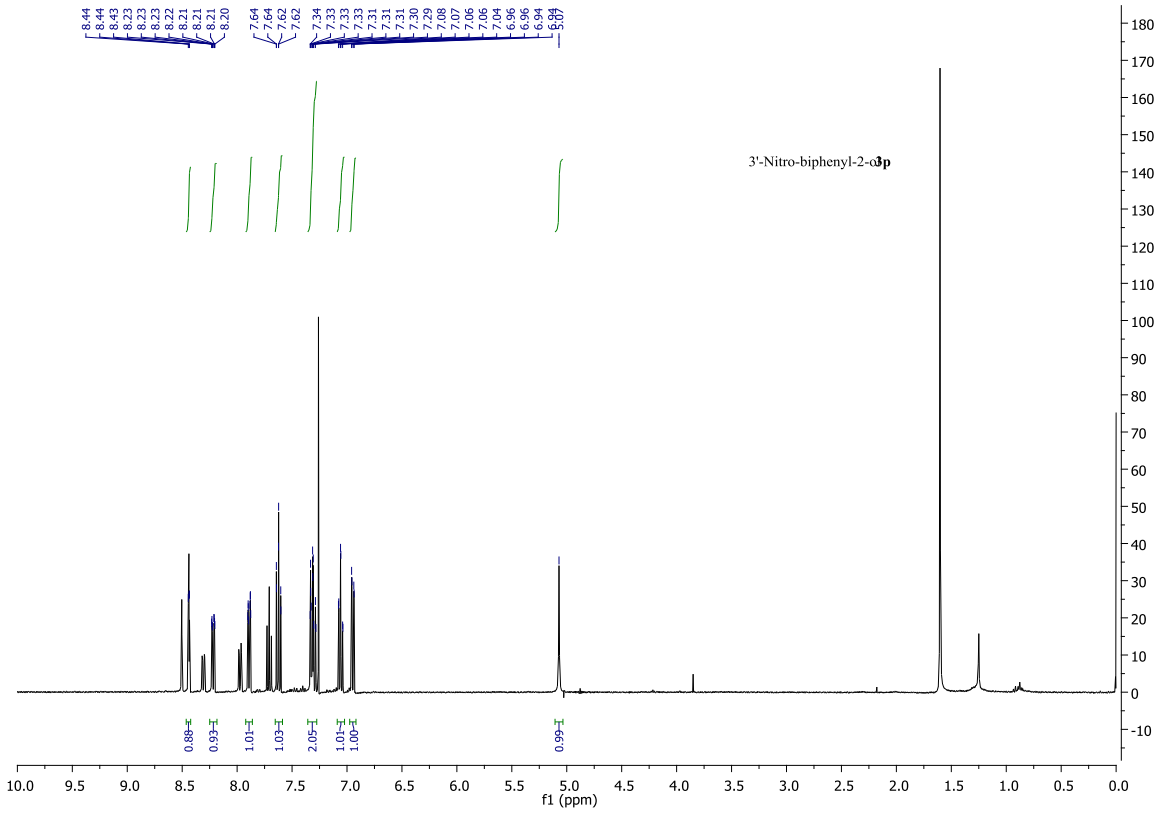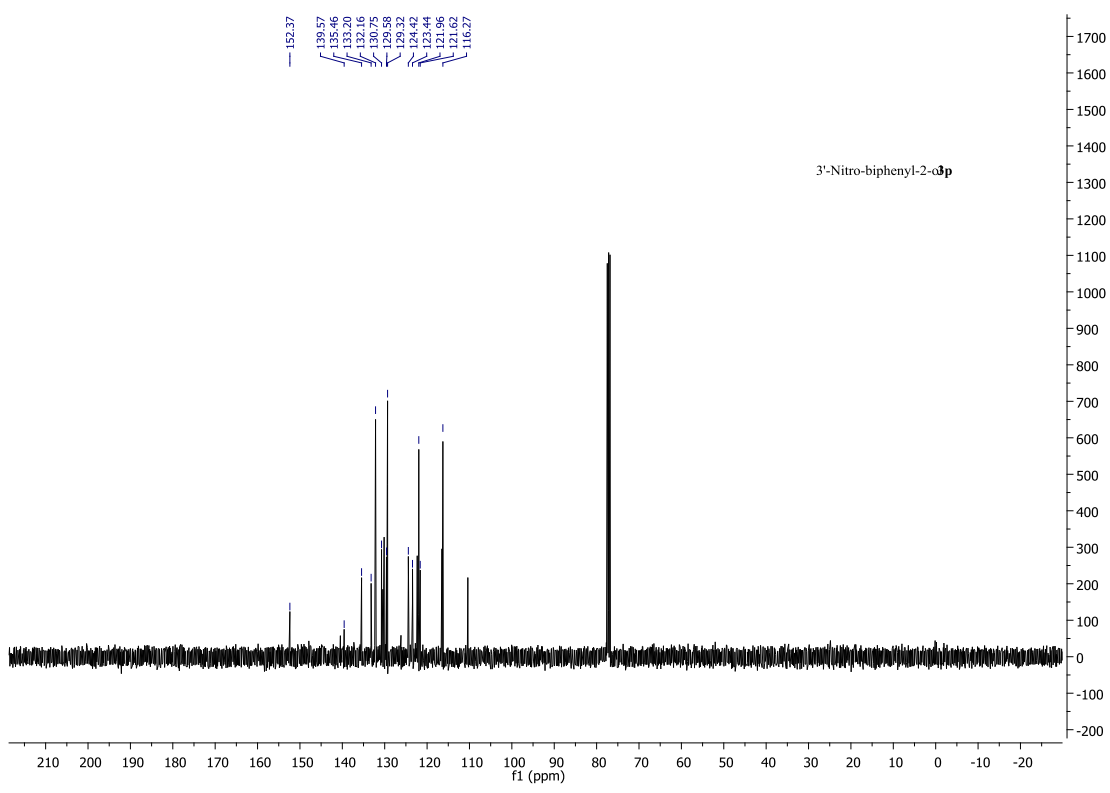

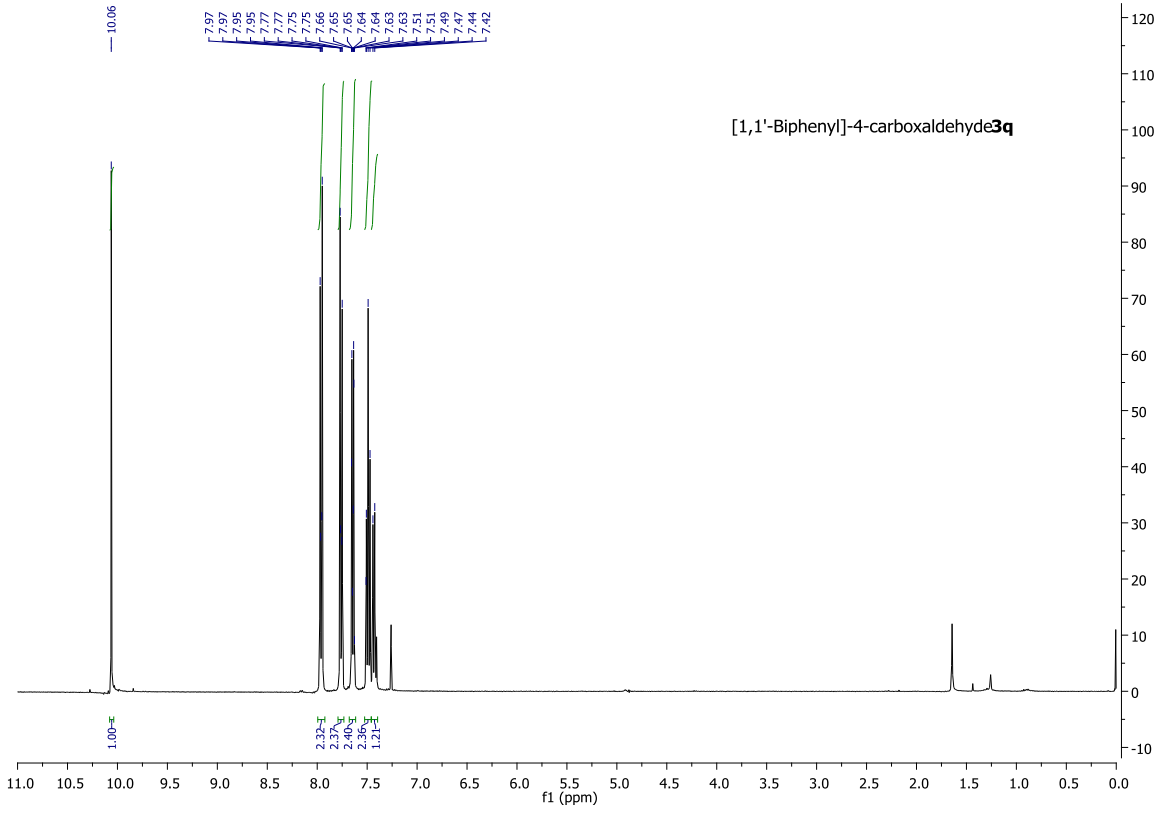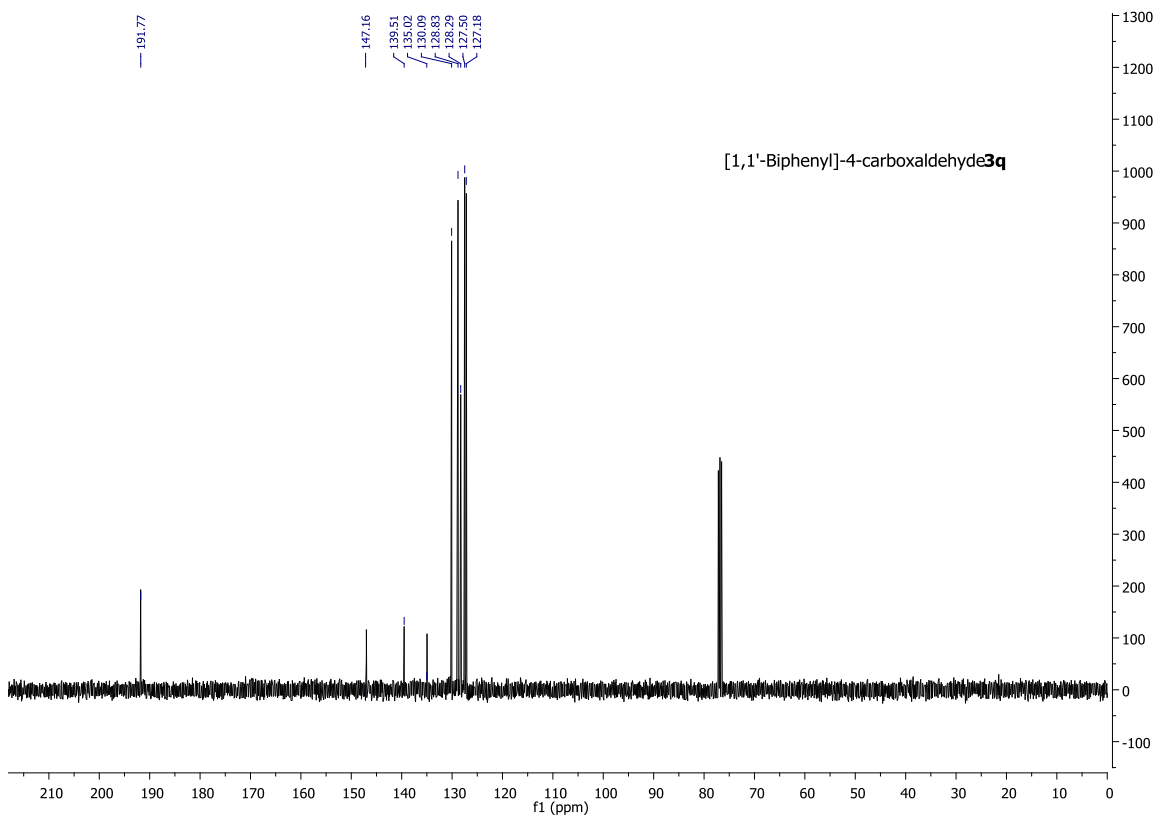

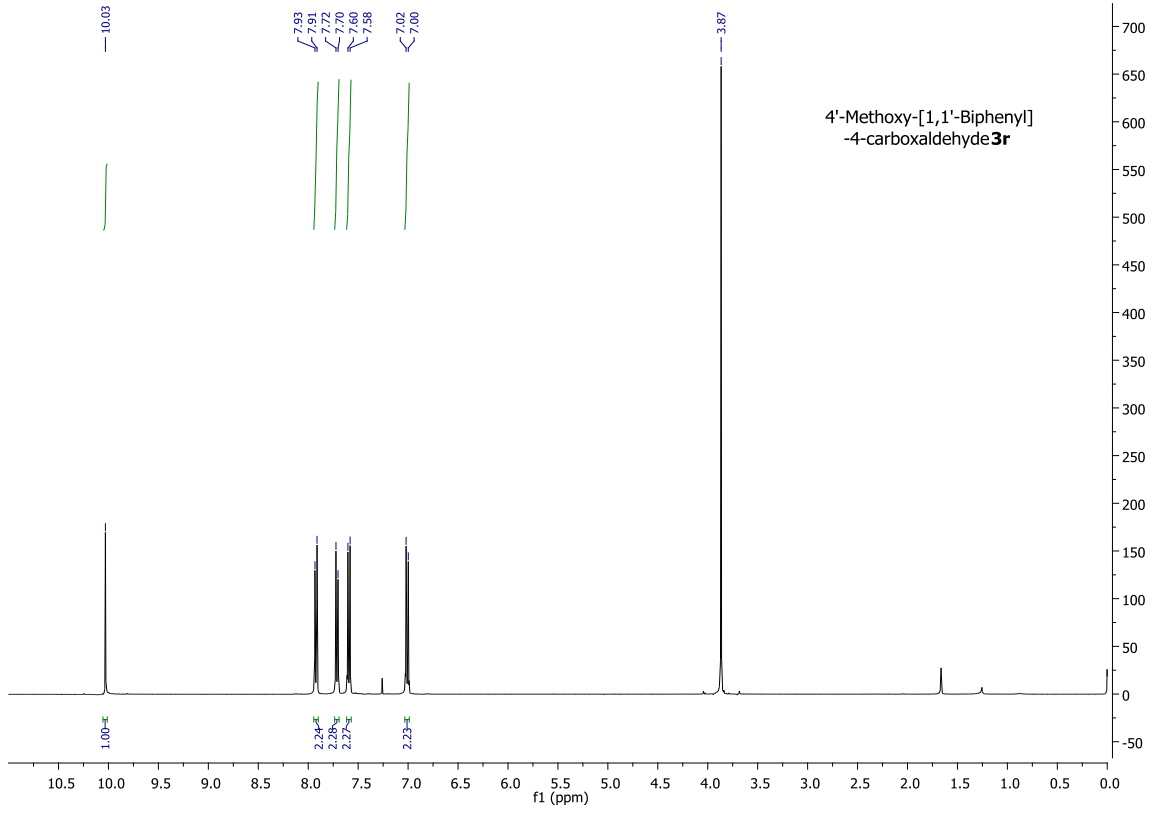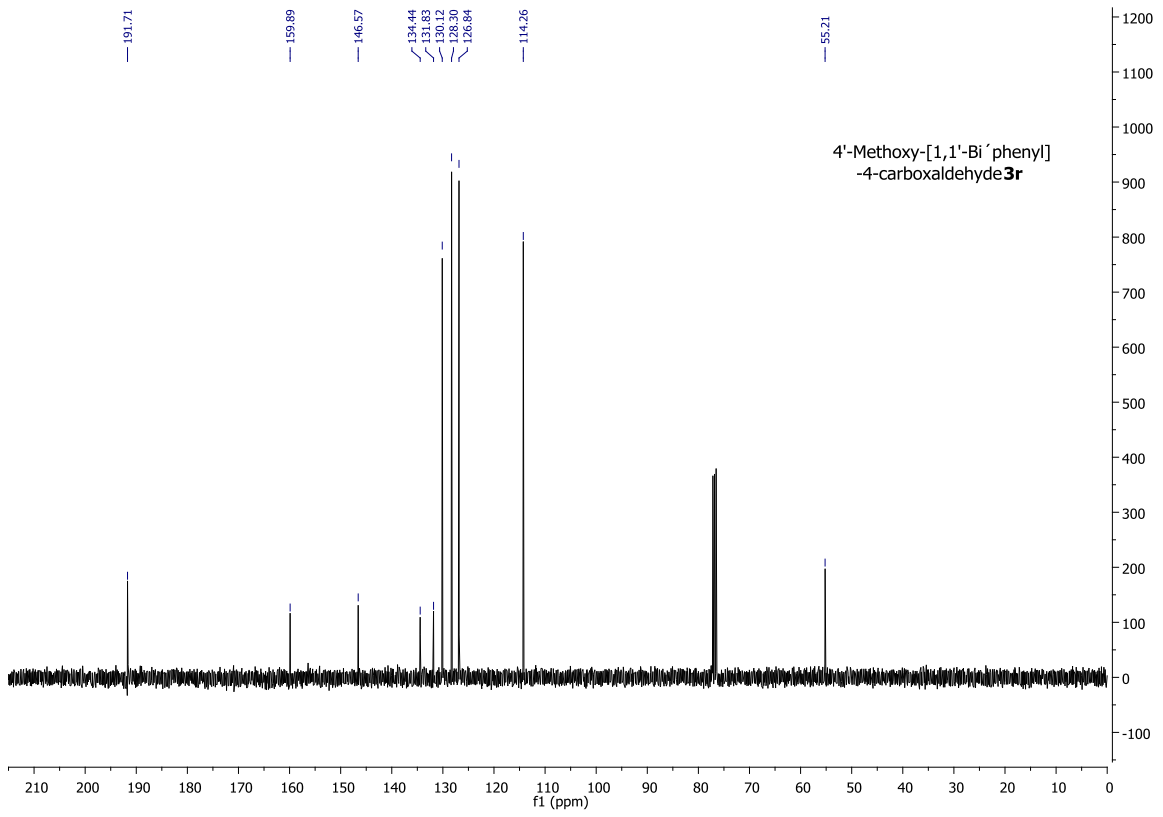



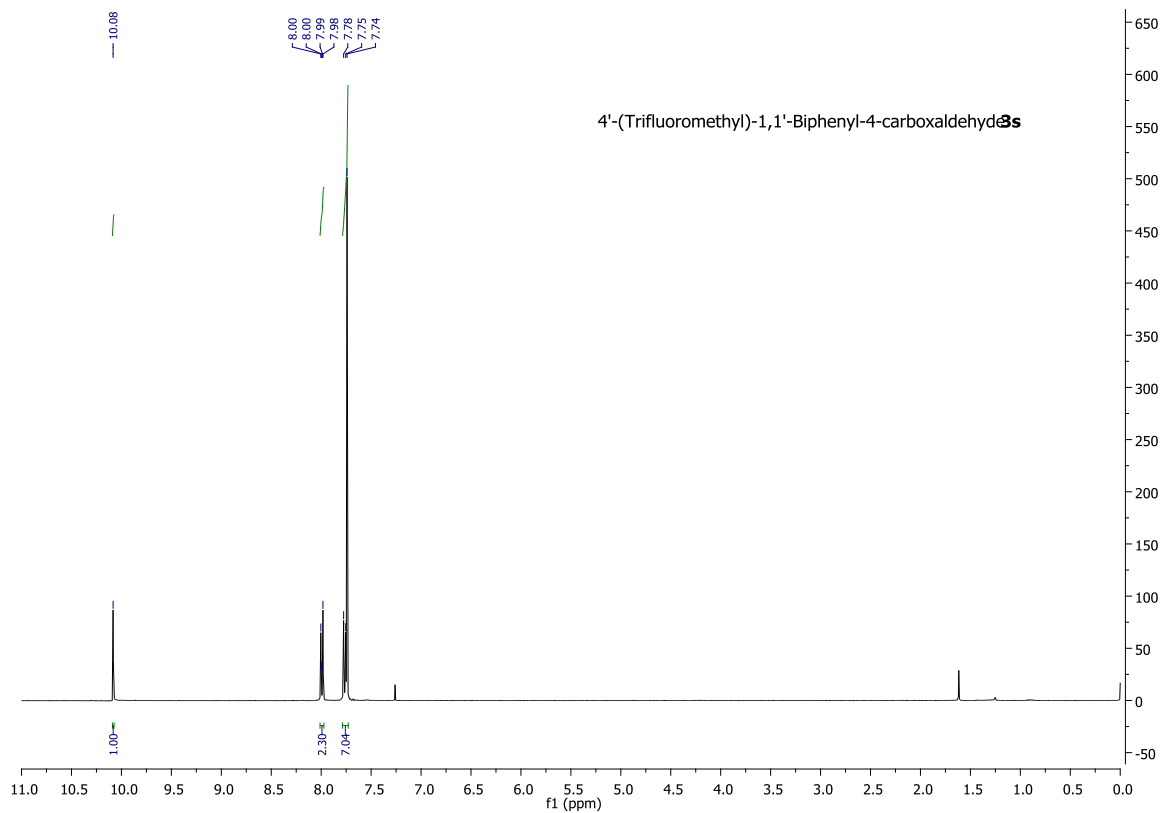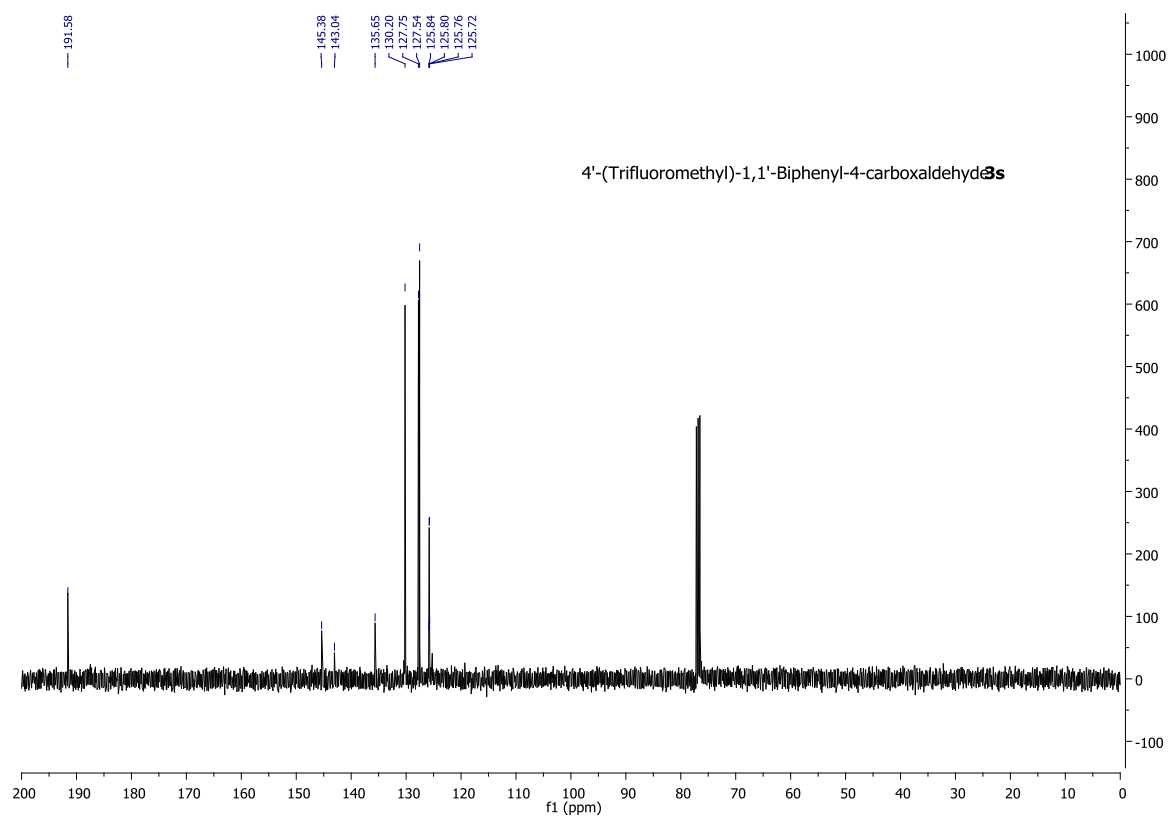

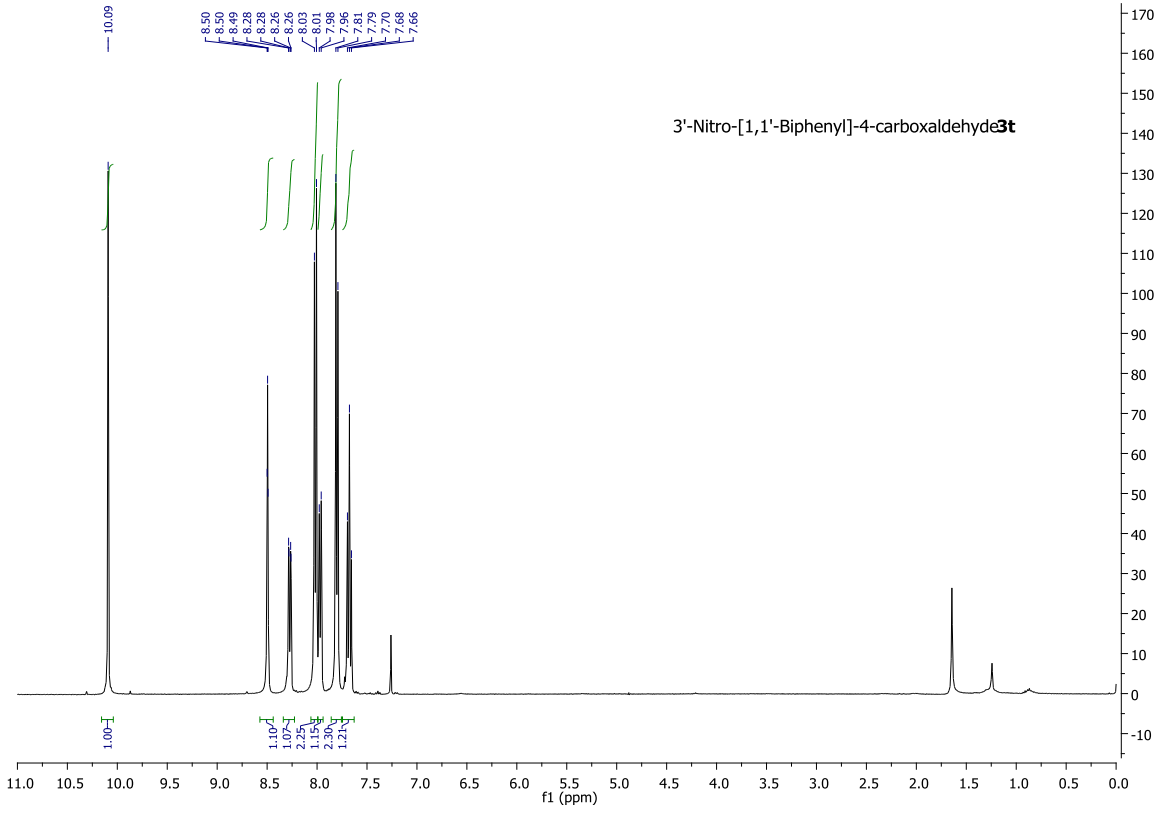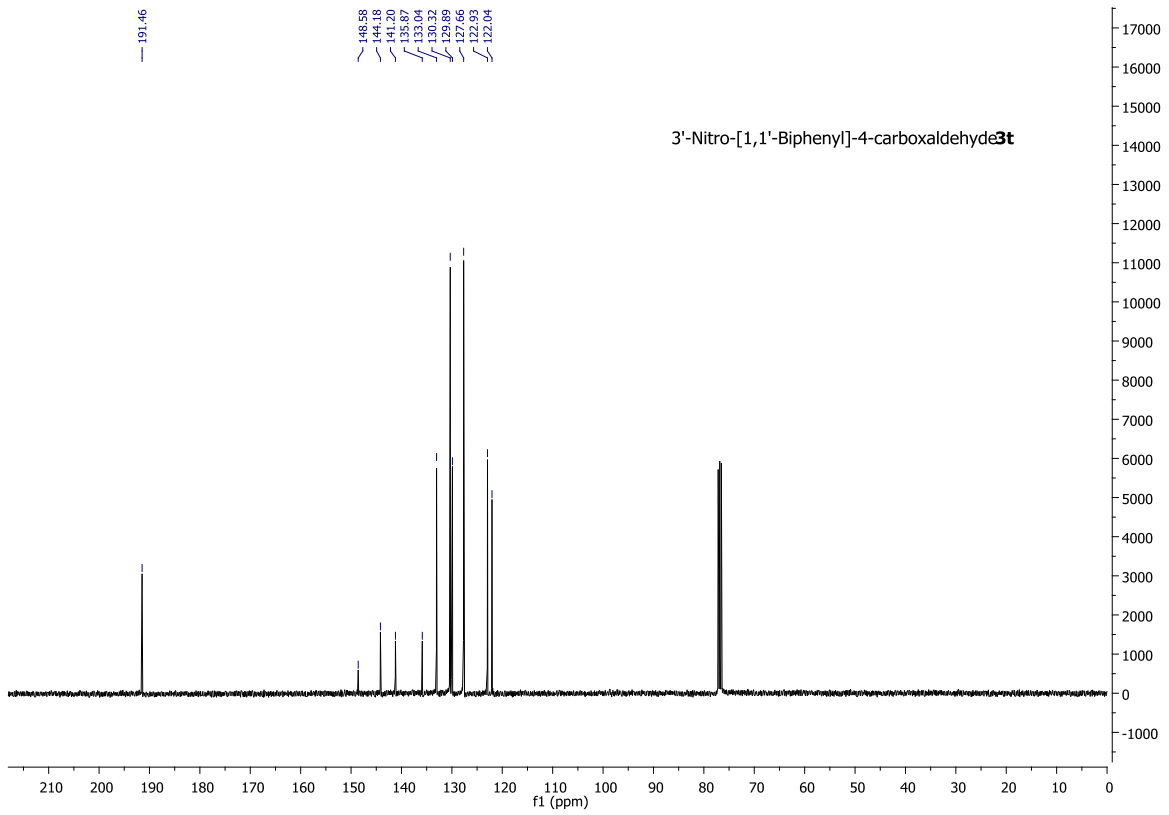

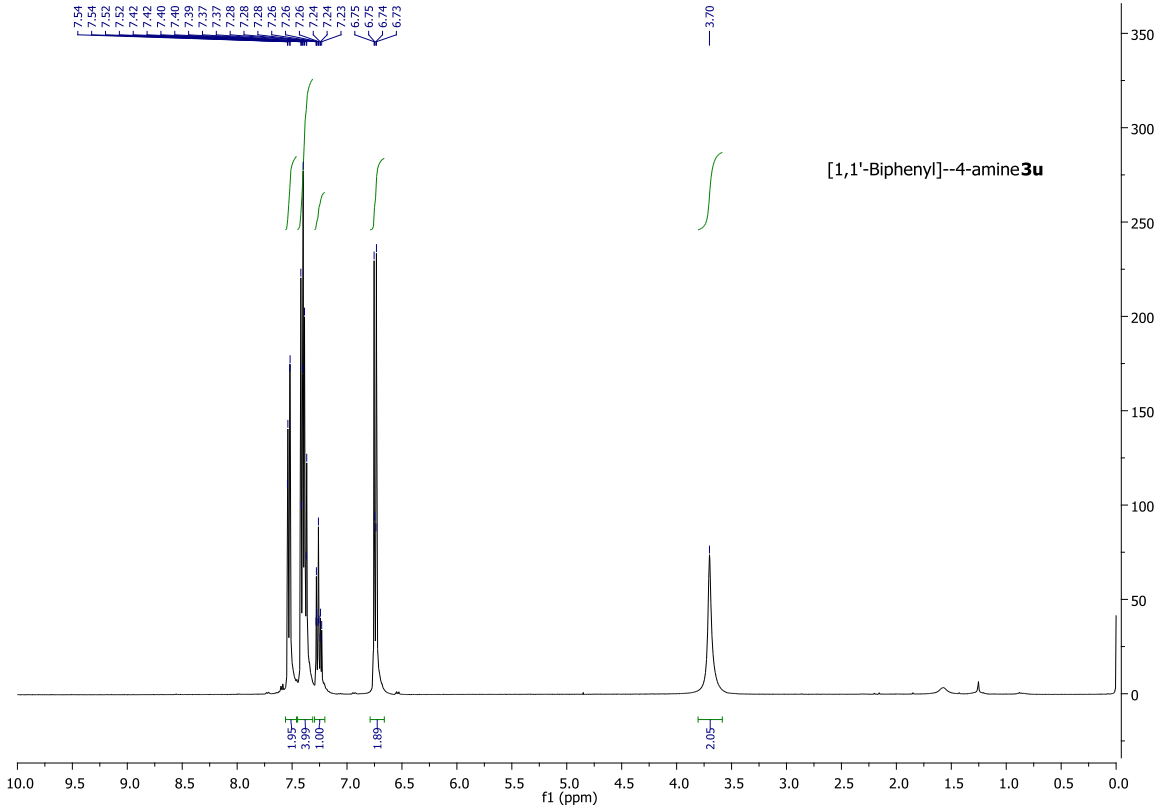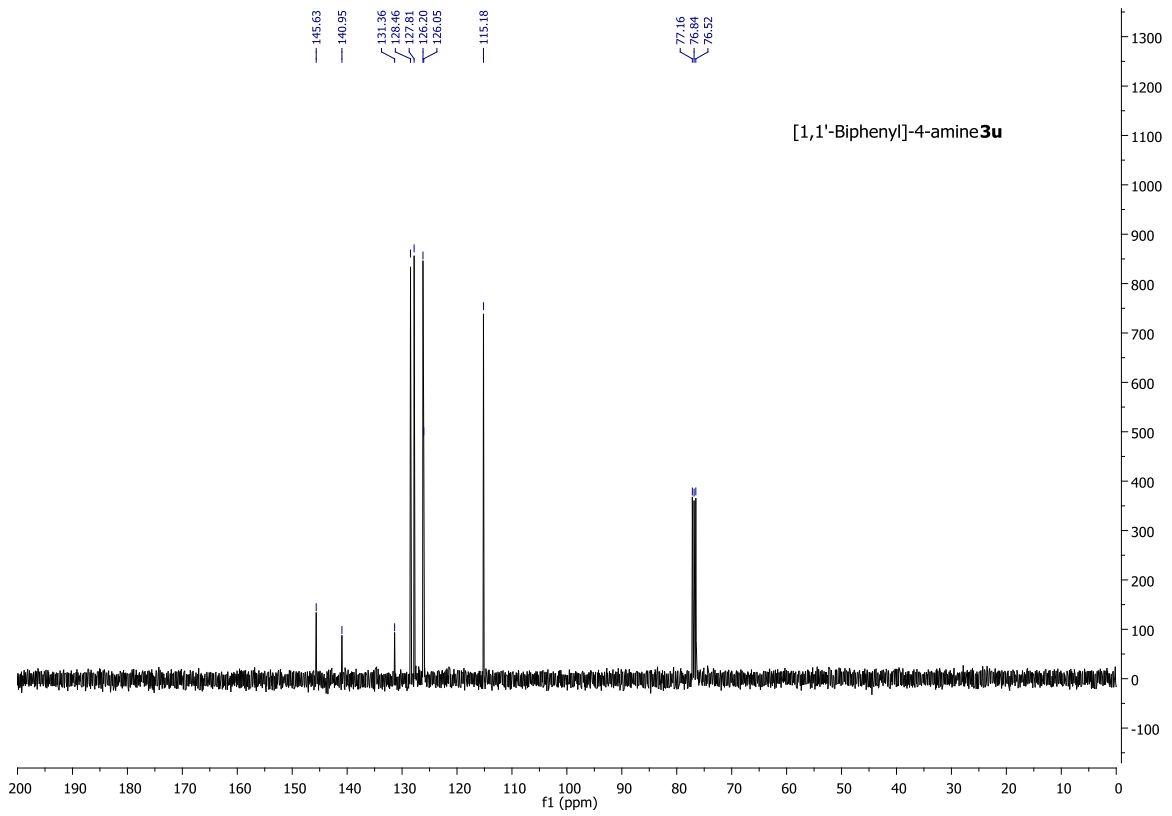

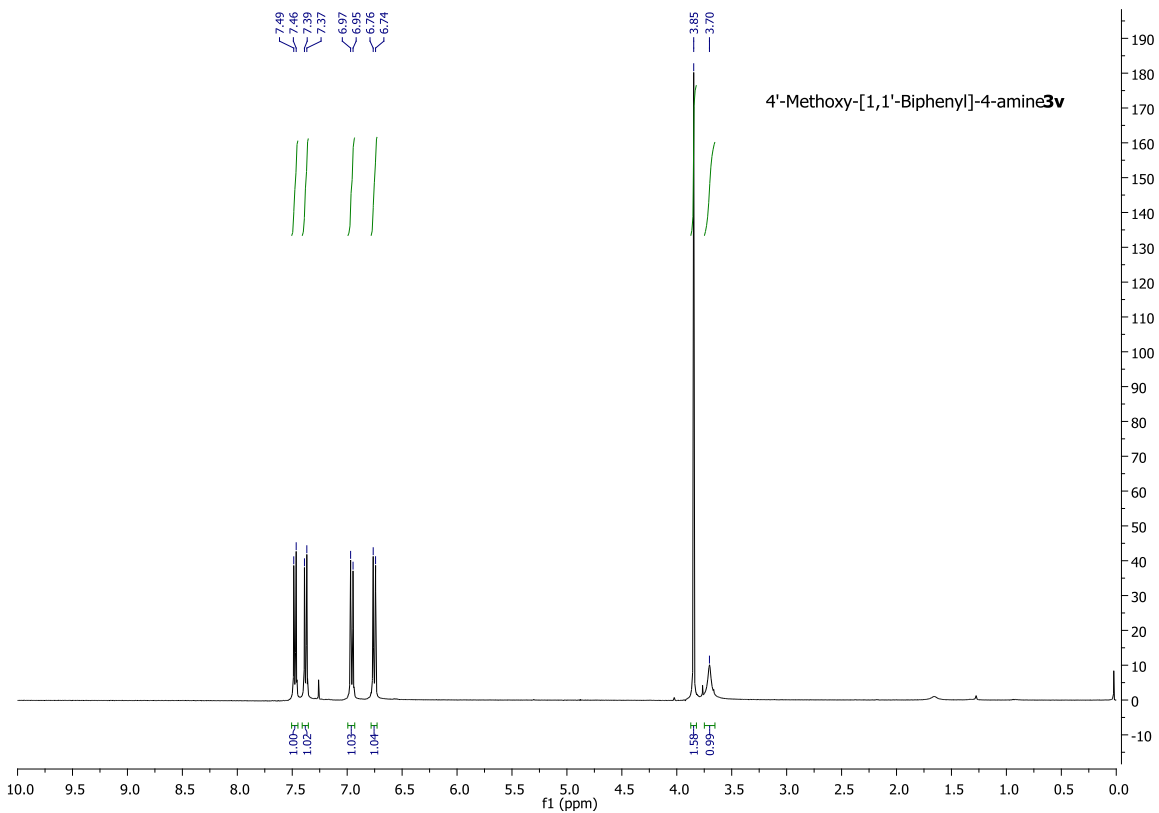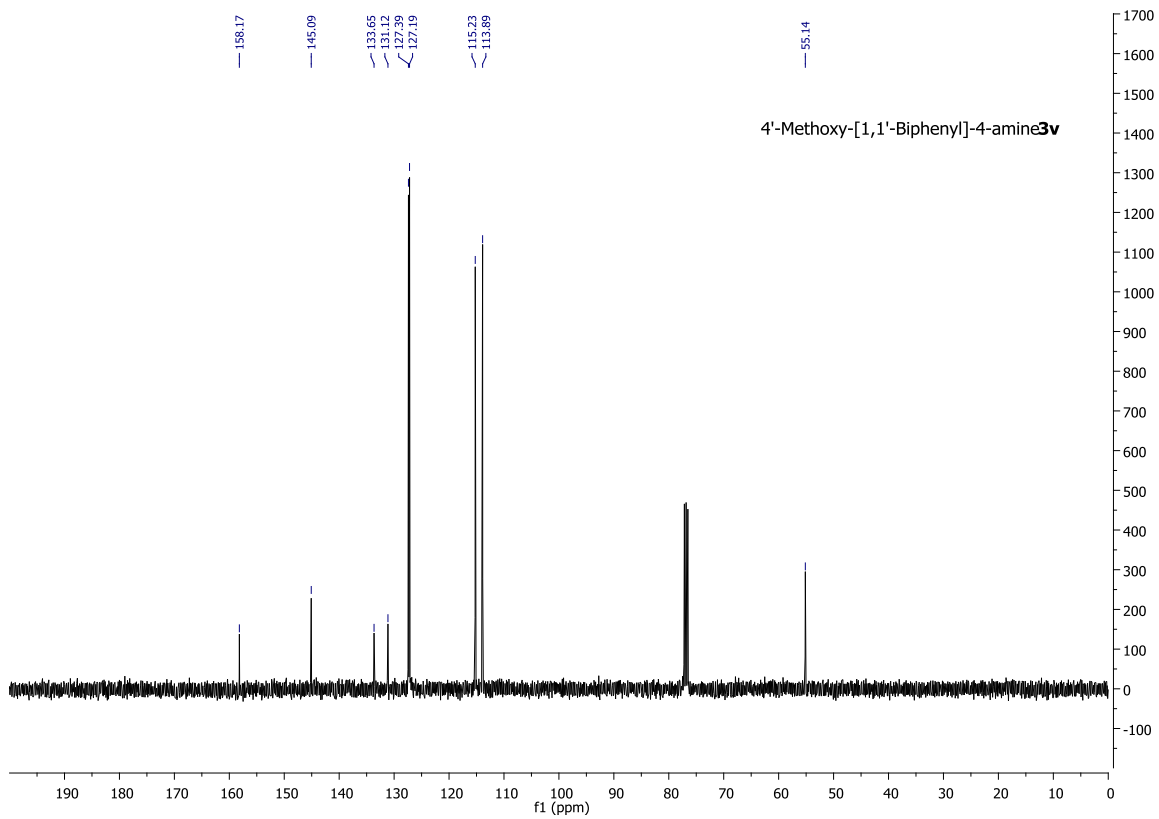

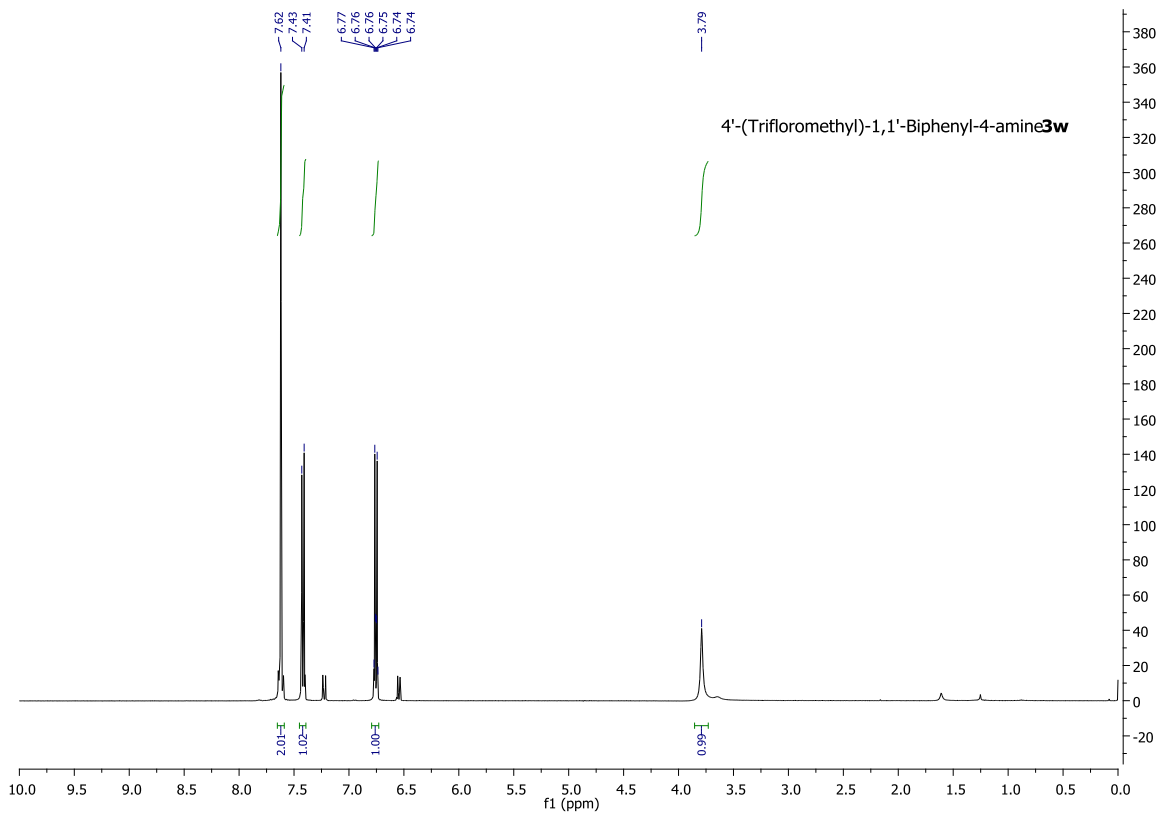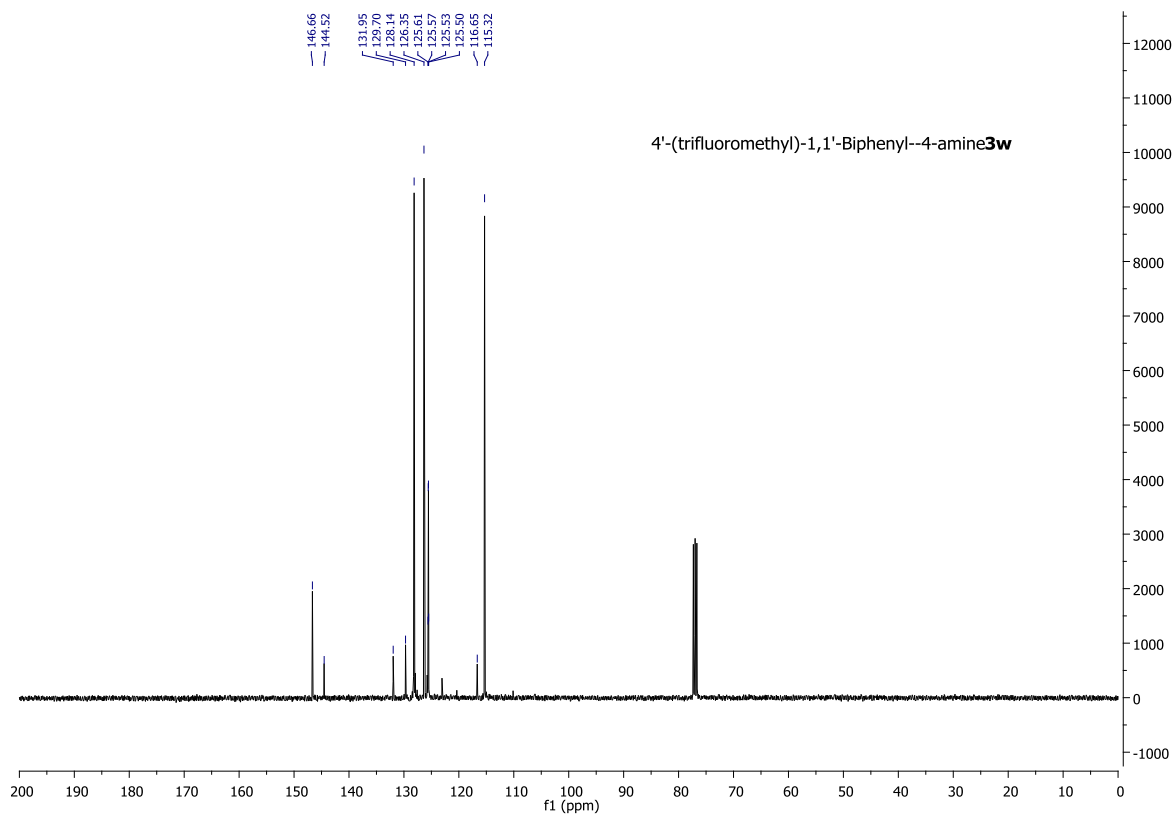

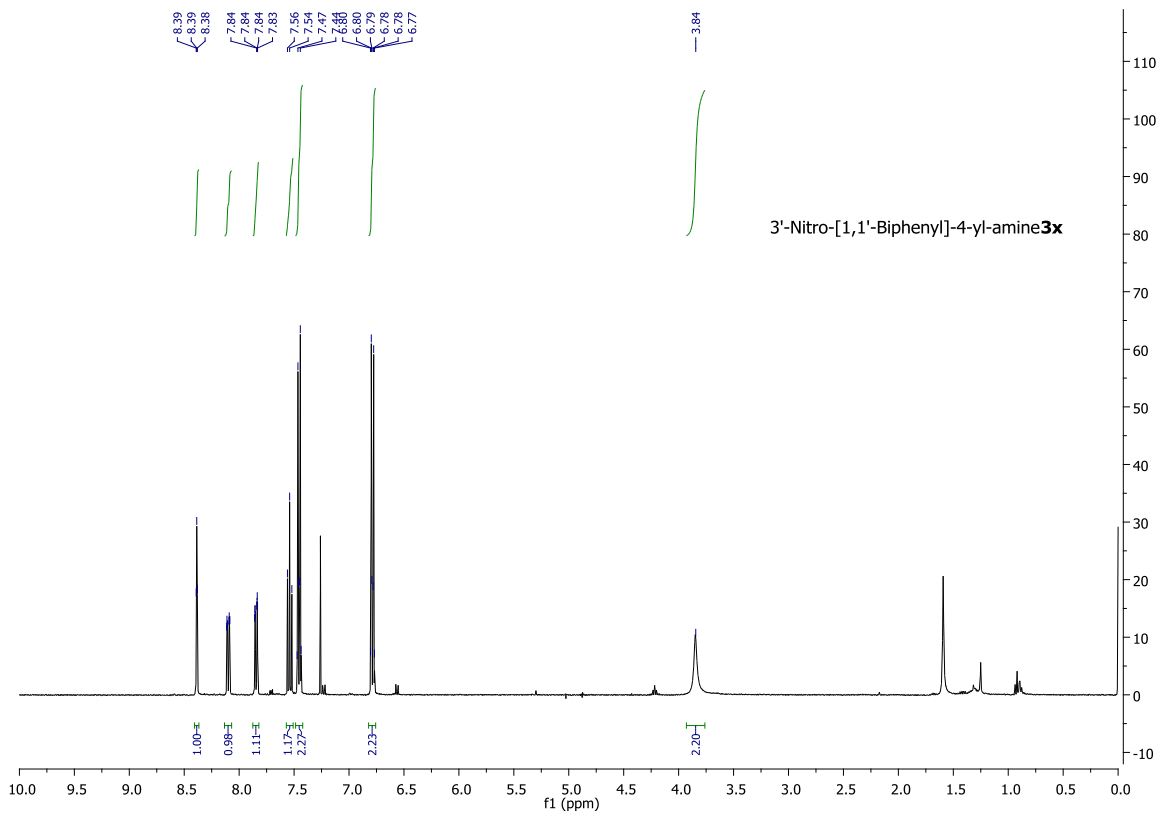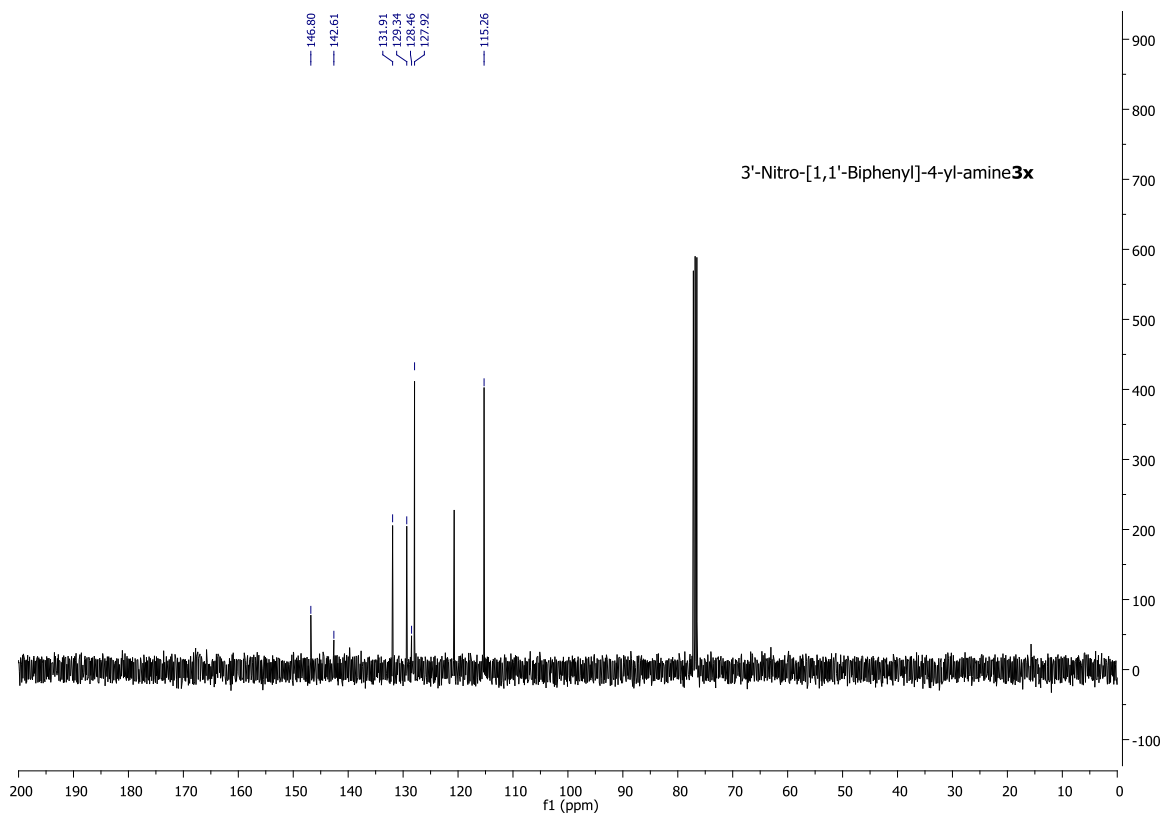

## References:

- [1] Onoue, H.; Minami, K.; Nakagawa, K. *Bull. Chem. Soc. Jpn.* **1970**, *43*, 3480-3485.
- [2] Z. G. Zhou, J. C. Shi, Q. S. Hu, Y. R. Xie, Z. Y. Du, S. Y. Zhang, *Appl. Organomet. Chem.* **2011**, *25*, 616.
- [3] Alacid, E.; Nájera, C. *Org. Lett.*, **2008**, *10*, 5011
- [4] Ackermann, L.; Potukuchi, H. K.; Althammer, A.; Born, R.; Mayer, P. *Org. Lett.*, **2010**, *12*, 1004.
- [5] Feiran Chen, F.; Huang, M.; Li, Y. *Ind. Eng. Chem. Res.*, **2014**, *53* (20), 8339–8345.
- [6] Mejías, N.; Pleixats, R.; Shafir, A.; Medio-Simón, M.; Asensio, G. *Eur. J. Org. Chem.*, **2010**, 5090–5099.
- [7] Ackermann, L.; Kapdi, A. R.; Fenner, S.; Kornhaaß, C.; Schulzke, C. *Chem. Eur. J.*, **2011**, *17*, 2965–2971.
- [8] Hwang, S. J.; Kim, H. J.; Chang, S. *Org. Lett.*, **2009**, *11* (20), 4588–4591.
- [9] Deraedt, C.; Salmon, L.; Ruiz, J.; Astruc, D. *Adv. Synth. Catal.*, **2013**, *355*, 2992–3001.
- [10] Liu, L.; Dong, Y.; Pang, B.; Ma, J. *J. Org. Chem.*, **2014**, *79* (15), 7193–7198.
- [11] Zhou, L.; Lu, W. *Organometallics*, **2012**, *31* (6), 2124–2127.
- [12] Q. Yang, S.M. Ma, J.X. Li, F.S. Xiao, H. Xiong, *Chem. Commun.*, **2006**, 2495.
- [13] Inamoto, K.; Kadokawa, J.; Kondo, Y. *Org. Lett.*, **2013**, *15* (15), 3962–3965.

- [14] Ren, H.; Xu, Y.; Jeanneau, E.; Bonnamout, I.; Tu, T.; Darbost, U. *Tetrahedron*, **2014**, *70*, 2829-2837.
- [15] Hirner, J. J.; Blum, S. A. *Organometallics*, **2011**, *30* (6), 1299–1302.
- [16] Alizadeh, A.; Khodaei, M. M.; Kordestani, D.; Beygzadeh, M. *Tetrahedron Lett.*, **2013**, *54*(4), 291-294.
- [17] Das, S.; Bhunia, S.; Maity, T.; Koner, S. *J. Mol. Catal. A-Chem.*, **2014**, *394*, 188-197.
- [18] Peña-López, M.; Sarandeses, L. A.; Pérez Sestelo, J. *Eur. J. Org. Chem.* **2013**, *13*, 2545-2554.
